1 ***Vitamin D Receptor Upregulates Tight Junction Protein Claudin-5 against***

2 ***Tumorigenesis***

3 Yongguo Zhang<sup>1</sup>, Shari Garrett<sup>1</sup>, Robert E. Carroll<sup>1</sup>, Yinglin Xia<sup>1</sup>, and Jun Sun<sup>2,3,4\*</sup>

4 1. Department of Medicine, College of Medicine, University of Illinois at Chicago,

5 Chicago, IL, USA

6 2. UIC Cancer Center, University of Illinois at Chicago, Chicago, IL, USA

7 3. Department of Microbiology/Immunology, College of Medicine, University of Illinois at

8 Chicago, Chicago, IL, USA

9 4. Jesse Brown VA Medical Center Chicago, IL (537), USA

10

11

12 **Correspondence:**

13 Jun Sun, Ph.D., Professor, AGAF, FAPS

14 [junsun7@uic.edu](mailto:junsun7@uic.edu)

15 **Author Contributions:** YZ: acquisition, analysis, and interpretation of data, drafting of the  
16 manuscript, and statistical analysis, SG: assistance with western blots and TJ data. YX:  
17 Statistical analysis, microbiome data analysis, and manuscript drafting. REC: Provided  
18 human biopsies and clinical perspectives of CRC. JS: study concept and design, analysis  
19 and interpretation of data, writing of the manuscript for important intellectual content,  
20 obtaining funding, and study supervision.

21

22 **Funding:** This research was funded by the UIC Cancer Center, the NIDDK/National  
23 Institutes of Health grants R01DK105118 and R01DK114126, VA Merit Award 1 I01  
24 BX004824-01, and DOD BC160450P1 to Jun Sun. The study sponsors played no role in  
25 the study design, data collection, analysis, and interpretation of data.

26

27 **Acknowledgments:** We would like to thank Dr. David Zhou for assisting with the CRC  
28 human samples, Drs. Shaoping Wu and Rong Lu for assisting with the AOM/DSS model,  
29 and Jason S. Xia for proofreading. The contents do not represent the views of the United  
30 States Department of Veterans Affairs or the United States Government.

31

32 **Conflicts of Interest:** The authors declare no conflict of interest. The funders played no  
33 role in the study design, the collection, analyses, or interpretation of data, the writing of the  
34 manuscript, or the decision to publish the results.

35

## 36 **A short summary**

### 37 *1. What is already known about this subject?*

38 • Tight junction structures are essential for intestinal barrier integrity, inflammation, and  
39 cancer.

40 • Vitamin D deficiency and the vitamin D receptor (VDR) play important roles in the  
41 development of colon cancer.

### 42 *2. What are the new findings?*

43 • Our study is the first to link barrier function, a specific tight junction protein, and genetic  
44 susceptibility through intestinal epithelial VDR in human colorectal cancer.

45 • Our study fills an existing gap by characterizing the mechanism of intestinal epithelial  
46 VDR in regulating barrier functions through alterations in TJs in tumorigenesis. VDR is  
47 important for the maintenance of the physiological level of the TJ protein Claudin-5 in the  
48 colon. The *CLDN-5* gene is a downstream target of the VDR signaling pathway. Lack of  
49 VDR led to a reduction of Claudin-5 in tumors, whereas enhancing VDR increased  
50 Claudin-5 to protect the intestinal epithelial cells from tumorigenesis.

51 • We report fecal VDR reduction in a colon cancer model. This introduces the possibility  
52 for the identification of new biomarkers and therapeutic targets to restore VDR-dependent  
53 functions in CRC.

### 54 *3. How might it impact on clinical practice in the foreseeable future*

55 • Diagnosis of CRC considering VDR status

56 • Barrier: direct, indirect biomarkers

57 • Intestinal barriers in cancer prevention and treatment

58 Barrier function and VDR are not only essential for the maintenance of intestinal  
59 homeostasis, but they are also critical for the development of chronic mucosal inflammation  
60 and cancer. This knowledge can be immediately used to develop intestinal VDR and  
61 Claudin-5 as clinical biomarkers for identifying patients who may benefit from currently  
62 available interventions and could also be used for the eventual development of novel  
63 strategies for the prevention and treatment of human CRC.  
64



65 **Abstract:**

66 **Background/Objective:** Tight junctions (TJs) are essential for barrier integrity,  
67 inflammation, and cancer. The TJ protein Claudin-5 in the epithelia forms paracellular  
68 barriers and pores for permeability. Vitamin D and the vitamin D receptor (VDR) play  
69 important roles in various cancers. Although VDR and Claudin-5 are all involved in  
70 colorectal cancer (CRC), it remains unclear if they are closely related or function  
71 independently. **Design:** Using the human CRC database, we explored the correlation  
72 between VDR and Claudin-5. We then investigated the VDR regulation of Claudin-5 using  
73 VDR knockout ( $VDR^{-/-}$ ) and intestinal epithelial VDR knockout mice ( $VDR^{\Delta IEC}$ ) with  
74 chemical-induced colon cancer and an epithelial VDR overexpression model. Human  
75 samples, organoids, and intestinal epithelial cells were used to determine the underlying  
76 mechanisms. **Results:** In human colon cancer, colonic VDR expression was low and was  
77 significantly correlated with a reduction of Claudin-5 mRNA and protein. In the colon of  
78  $VDR^{-/-}$  and  $VDR^{\Delta IEC}$  mice, deletion of VDR led to lower protein and mRNA levels of  
79 Claudin-5. Intestine permeability was increased in the AOM-DSS-induced  $VDR^{-/-}$  colon  
80 cancer model. Lack of VDR and a reduction of Claudin-5 are associated with an increased  
81 number of tumors in the  $VDR^{-/-}$  and  $VDR^{\Delta IEC}$  mice. Furthermore, gain and loss of function  
82 studies have identified *CLDN-5* as a downstream target of the VDR signaling pathway.  
83 Epithelial VDR overexpression protected against the loss of Claudin 5 in response to  
84 intestinal inflammation **Conclusion:** This study advances the understanding of how VDR  
85 regulates intestinal barrier functions in tumorigenesis as a biomarker and potential  
86 treatment.

87

88 **Keywords:** Claudin, barrier function, inflammation, colon cancer, colitis, tight junction,

89 Vitamin D, vitamin D receptor

90

## 91 **Introduction**

92 Tight junction structures are essential for intestinal innate immunity and barrier function.  
93 The disruption of TJs is a common manifestation of various diseases, including chronic  
94 inflammation and cancer. Changes in the expression and distribution of TJ proteins such as  
95 Claudin-2, -5, and -8 lead to discontinuous TJs and barrier dysfunction in active Crohn's  
96 disease (CD), a type of inflammatory bowel disease [1]. Claudin-5 is expressed in the  
97 epithelia and endothelia and forms paracellular barriers and pores that determine  
98 permeability. This protein is downregulated in colon cancer [2, 3].

99

100 VDR is a nuclear receptor that mediates most known functions of the biologically active  
101 form of vitamin D [4, 5, 6]. VDR possesses multiple critical functions in regulating innate  
102 and adaptive immunity, intestinal homeostasis, host response to microbiota, and tight  
103 junction structure [7, 8, 9, 10, 11, 12, 13, 14]. Vitamin D/VDR deficiency has been  
104 implicated in patients with inflammatory bowel disease and colon cancer [15, 16, 17, 18, 19,  
105 20, 21]. Our study demonstrated that VDR is essential for maintaining intestinal and  
106 microbial homeostasis [22] and for protecting against intestinal tumorigenesis [23] [24].  
107 Although vitamin D has been extensively studied, many critical questions regarding the  
108 biological functions of intestinal VDR in CRC remain unanswered. Although VDR and TJ  
109 proteins (e.g., Claudins) are involved in colon cancer, it remains unclear if they are closely  
110 related or function independently. Considering the multiple functional roles of VDR in the  
111 development of colon cancer [20, 24], it is important to dissect the cellular and molecular

112 mechanisms by which VDR contributes to barrier function in protecting the host from  
113 tumorigenesis.

114

115 Here, we revisited the human CRC database and determined that colonic VDR expression  
116 is low and positively correlated with the reduction of the TJ protein Claudin-5 in CRC,  
117 including colitis-associated colon cancer. We investigated the novel role of VDR in  
118 regulating Claudin-5 expression using VDR<sup>-/-</sup> and intestinal epithelial VDR knockout mice  
119 (VDR<sup>ΔIEC</sup>) in a colitis-associated colon cancer model. Human organoids, human colon  
120 cancer samples, VDR<sup>-/-</sup> mouse embryonic fibroblasts (MEF) cells, and cultured intestinal  
121 epithelial cells were used to determine the molecular mechanisms. We determined that  
122 VDR is an important transcriptional regulator for the maintenance of physiological levels of  
123 the target gene *Claudin-5* in the intestine. Furthermore, we generated a conditional  
124 intestinal epithelial VDR-overexpressed mouse model to study the protective role of VDR in  
125 the maintenance of TJs in the context of inflammation. Our goal was to provide a detailed  
126 understanding of how VDR status contributes to intestinal inflammation and cancer. Our  
127 findings may offer an additional avenue to treat colon cancer by restoring barrier functions  
128 and developing a new protocol for risk assessment and prevention of cancer.

129

130

## 131 **Results**

### 132 **Reduced VDR was positively correlated with low Claudin-5 expression in CRC** 133 **patients**

134 We first examined the gene expression levels of VDR and Claudin-5 in normal and human  
135 CRC samples by reviewing the GEO databases GSE 4183 and GSE 8671 from Affymetrix  
136 data (human genome U133 Plus 2.0 arrays). Reduced VDR and Claudin-5 expression was  
137 observed in patients with CRC (**Fig. 1A**). To quantify and visualize the correlations between  
138 intestinal Claudin-5 and the VDR protein, we performed a regression analysis of VDR  
139 against Claudin-5 and conducted a scatter plot with a regression line (**Fig. 1B**). We found  
140 significantly coordinated expression of VDR and Claudin-5 in biopsy samples collected  
141 from patients with CRC. We further analyzed data obtained from human colitis-associated  
142 colon cancer (**Fig. 1C**). VDR and Claudin-5 expression was significantly reduced in patients  
143 with colitis-associated CRC (GEO database GSE8671, GSE10714, and GSE37283) (**Fig.**  
144 **1C**). We identified a positive correlation between VDR and Claudin-5 in biopsy samples  
145 collected from colitis-associated CRC patients and healthy controls (**Fig. 1D**). We then  
146 examined the protein levels of intestinal VDR in normal and CRC human colon samples  
147 using IHC. Compared to normal intestines, CRC patients with CRC possessed significantly  
148 lower VDR expression (**Fig. 1E**). Immunofluorescence (IF) staining of Claudin-5 revealed  
149 significantly lower Claudin-5 expression in CRC human colon samples (**Fig. 1F**). We  
150 performed correlation analysis and scatter plots of the staining intensity changes between  
151 the VDR protein and Claudin-5 in the colon. The results revealed that the staining intensity  
152 of Claudin-5 and intestinal VDR was positively associated with the Pearson correlation

153 coefficient (**Fig. 1G**). Thus, we revealed that colonic VDR expression is low and is  
154 correlated with the reduction of Claudin-5 at both mRNA and protein levels in human CRC,  
155 including colitis-associated colon cancer.

156

### 157 **Larger and more tumors developed in VDR deficient mice**

158 Animal models have been developed to reflect the initiation and progression of human  
159 colon cancer [25]. Azoxymethane (AOM) [26] mice develop hyperproliferative colonic  
160 mucosa, aberrant crypt foci (ACF), and eventually carcinomas [27]. An AOM–dextran  
161 sulfate sodium (DSS) model is widely used to study colitis-associated colon cancer [28].  
162 We next investigated the role of VDR in regulating Claudin-5 expression in the development  
163 of cancer using an AOM/DSS-treated mouse model (**Fig. 2A**). For wild-type  $VDR^{+/+}$  and  
164 whole-body VDR knockout ( $VDR^{-/-}$ ) mice, representative colons with tumors are shown  
165 (**Fig. 2B**). We observed that AOM/DSS-treated  $VDR^{-/-}$  mice developed more tumors in the  
166 colon (**Fig. 2C**). The maximum tumor size was significantly larger in  $VDR^{-/-}$  mice compared  
167 to that in  $VDR^{+/+}$  mice (**Fig. 2D**). Furthermore, pathological analysis of colon samples  
168 indicated differences in tumor stage (carcinoma versus adenoma) between  $VDR^{-/-}$  mice and  
169 the  $VDR^{+/+}$  AOM/DSS experimental groups (**Fig. 2E**). Epithelial hyperproliferation plays a  
170 critical role in the development of cancer. The IF data of the proliferative marker PCNA  
171 revealed that PCNA in the colon was significantly increased in the  $VDR^{-/-}$  mice compared to  
172 that in the  $VDR^{+/+}$  mice (**Fig. 2F**). Chronic inflammation is one of the factors that contribute  
173 to CRC. We determined that the serum cytokines TNF- $\alpha$ , IL-1 $\beta$ , and IL-17 were significantly  
174 higher in the  $VDR^{-/-}$  mice, compared to levels in the  $VDR^{+/+}$  mice (**Fig. 2G**).

175

176 **VDR deletion leads to decreased Claudin-5 expression in tumor tissues**

177 We examined changes in barrier function by testing intestinal permeability in mice with or  
178 without tumors. Mice were gavaged with fluorescein dextran (molecular weight 3 kDa). After  
179 4-h, blood samples were collected for fluorescence intensity measurements. Higher  
180 fluorescence intensity is indicative of higher intestinal permeability. As shown in **Fig. 3A**,  
181 AOM/DSS treatment induced increased intestinal permeability in both VDR<sup>+/+</sup> and  
182 VDR<sup>-/-</sup> mice, while the VDR<sup>-/-</sup> mice exhibited significantly higher permeability  
183 post-treatment. Based on the *in vivo* intestinal permeability data, we hypothesized that the  
184 TJ proteins would be altered in the AOM/DSS mice. In the VDR<sup>-/-</sup> mice, we observed  
185 significant downregulation of Claudin-5 at the mRNA and protein levels in the colon (**Fig.**  
186 **3B & 3C**). Claudin-5 staining was observed at the crypt surface and at the lower portion of  
187 the intestine. Reduced Claudin-5 expression was confirmed through the immunostaining of  
188 AOM/DSS mice (**Fig. 3D & 3G**). However, VDR deletion did not alter the expression of the  
189 TJ protein Claudin-7 in the colon of VDR<sup>-/-</sup> mice compared to that in VDR<sup>+/+</sup> mice (**Fig. 3E**).  
190 VDR expression was also decreased in mice with AOM/DSS-induced colon cancer (**Fig. 3F**  
191 **and 3H**). Moreover, we used our recently established method to measure VDR levels  
192 according to qPCR in fecal samples [29]. We detected a significant reduction in VDR in  
193 fecal samples from mice with tumors (**Fig. 3I**). These data also suggest a decreased VDR  
194 in epithelial cells that are shed from mice with tumors.

195

196 **Conditional deletion of intestinal epithelial VDR led to increased permeability and**  
197 **reduced Claudin-5 in the AOM/DSS cancer model.**

198 Intestine permeability was also significantly increased in VDR<sup>ΔIEC</sup> mice with conditional  
199 deletion of intestinal epithelial VDR (**Fig. 4A**). Intestinal epithelial VDR-specific deletion led  
200 to significantly decreased Claudin-5 at the mRNA level in the colon (**Fig. 4B**) and further  
201 decreased in the mice with colon cancer; however, other Claudin, such as Claudin-7, was  
202 not altered in the absence of VDR. At the protein level, we found the reduced Claudin-5 in  
203 the VDR<sup>ΔIEC</sup> mice (**Fig. 4C**). In tumor tissues of VDR<sup>ΔIEC</sup> mice epithelial Claudin-5 was  
204 disorganized (**Fig. 4D**) and significantly decreased, compared to that in tumors of VDR<sup>loxP</sup>  
205 mice (**Fig. 4F**). In contrast, Claudin-7 was not altered in tumors from VDR<sup>ΔIEC</sup> mice  
206 compared to the tumor tissue of VDR<sup>loxP</sup> mice (**Fig. 4E**). The VDR expression in fecal  
207 samples was downregulated in the AOM-DSS VDR<sup>loxP</sup> mice (**Fig. 4G**).

208

209 **Identification of the Vitamin D-response element (VDRE) in the Claudin-5 promoter**

210 To confirm the direct regulation of VDR on Claudin-5, we examined various models at the  
211 basal level without any treatment *in vivo* and *in vitro*. In the VDR<sup>-/-</sup> mice, we observed that  
212 these mice possessed lower Claudin-5 protein levels in the colon than did VDR<sup>+/+</sup> mice, and  
213 TJ Claudin-7 was not altered in the absence of VDR (**Fig. S1A**). We further detected  
214 significantly decreased mRNA levels of Claudin-5 in the intestines of VDR<sup>-/-</sup> mice (**Fig.**  
215 **S1B**). The density of Claudin-5 fluorescence staining was weaker in the VDR<sup>-/-</sup> mouse  
216 intestines (**Fig. S1C**). We also assessed the specificity of intestinal VDR in regulating  
217 Claudin-5 expression in VDR<sup>ΔIEC</sup> mice (**Fig. S1D**). Claudin-5 mRNA levels were significantly



218 reduced in VDR<sup>ΔIEC</sup> mice compared to the levels in VDR-lox mice (**Fig. S1E**). As expected,  
219 Claudin-7 expression remained unchanged. These data indicate that intestinal VDR  
220 specifically regulates the expression level of Claudin-5 in the colon. To confirm our findings  
221 *in vitro*, we used MEFs with VDR deletion. Lack of VDR led to a robust decrease in  
222 Claudin-5 protein and mRNA levels in VDR<sup>-/-</sup> MEFs at the basal level (**Fig. S1F** and **S1G**).  
223 The density of Claudin-5 fluorescence staining was also weaker in VDR<sup>-/-</sup> MEFs (**Fig. S1H**).  
224  
225 VDR acts as a transcription factor to regulate the expression of its target genes [30, 31].  
226 Activated VDR binds to VDRE in the target gene promoter to regulate gene transcription  
227 [32]. We reasoned that VDR may bind to the *Claudin-5 promoter* to thus alter the mRNA  
228 expression of the Claudin-5 gene. Further, we performed a CHIP assay using the colon  
229 mucosal extract from VDR<sup>-/-</sup> mice and nonspecific IgG as a negative control to assess the  
230 binding of VDR to the Claudin-5 promoter. The samples were amplified by conventional  
231 PCR using Iκβ as a positive control and Claudin-1 as a negative control as indicated in  
232 previous publications [33]. CHIP-PCR demonstrated that VDR bound to the Claudin-5  
233 promoter in the VDR<sup>+/+</sup> mouse colon (**Fig. 5A**). The VDRE sequence  
234 (AGTTCAAGTGGTTCT) within the Claudin-5 promoter region is shown in Figure **5B**.  
235 However, siRNA-based Claudin-5 knock-down did not reduce VDR expression at the  
236 mRNA level (**Fig. 5C**). At the protein level, reduced Claudin-5 did not change the status of  
237 VDR protein or Claudin-7 at the protein level (**Fig. 5D**). These results suggest that VDR  
238 transcriptionally regulates Claudin-5 at the mRNA level and that VDR is the upstream  
239 regulator of Claudin-5.

240

241 **High VDR levels led to increased Claudin-5 protein and mRNA levels *in vitro*.**

242 We then explored the possibility of enhancing VDR to maintain the physiological level of  
243 Claudin-5. Vitamin D3 is known to increase VDR expression and to activate VDR signaling.  
244 We used the human colonic epithelial SKCO15 cell line that is widely used to study TJs [34,  
245 35]. Claudin-5 mRNA level was significantly elevated in SKCO15 cells treated with vitamin  
246 D3, while Claudin-7 mRNA was not altered by vitamin D3 treatment (**Fig. 6A**). The protein  
247 level of Claudin-5 was induced by vitamin D3 (**Fig. 6B**). *In vivo*, Claudin-5 mRNA levels  
248 were also increased in vitamin D3-treated mice (**Fig. 6C**). Colonoids are three-dimensional  
249 (3D) cell cultures that incorporate a number of key features of the colon [36]. In this study,  
250 we developed human colonoids (**Fig. 6E**), and we observed vitamin D3 treatment  
251 significantly increased Claudin-5 mRNA levels in these colonoids (**Fig. 6F**). Furthermore,  
252 vitamin D3 treatment significantly increased Claudin-5 protein levels in human colonoids,  
253 whereas there was no change of Claudin-7 after vitamin D3 treatment (**Fig. 6G**).

254

255 **Intestinal epithelial VDR overexpression protected against the loss of Claudin 5 in**  
256 **respond to inflammation.**

257 To further study the protective role of VDR in maintaining TJs in inflammation, we  
258 generated a conditional intestinal epithelial VDR specific-overexpressed (O-VDR) mouse  
259 model. Epithelial VDR overexpression in mouse intestines significantly increased Claudin-5  
260 expression at both the mRNA and protein levels (**Fig. 7A & B**). Claudin-5 exhibited a less  
261 decrease at the mRNA and protein and mRNA levels in the colon of O-VDR mice treated

262 with DSS, compared to that in the O-VDR<sup>loxP</sup> mice (**Fig. 7C &7D**). Using IF staining, we  
263 determined that Claudin-5 was better preserved in the colon of O-VDR mice treated with  
264 DSS compared to that in the O-VDR<sup>loxP</sup> mice (**Fig. 7E &7G**). As anticipated, Claudin-7  
265 expression was unchanged in the intestinal tissue of O-VDR mice that were treated with  
266 DSS compared to that in the O-VDR<sup>loxP</sup> mice (**Fig. 7F**). VDR levels in fecal samples were  
267 detected using RT-PCR. VDR level was less decreased in DSS-treated O-VDR mice,  
268 compared to that in O-VDR<sup>loxP</sup> mice treated with DSS (**Fig. 7H**). Moreover, there were fewer  
269 inflammatory cytokines such as IL-1 $\beta$  and IL-17 in the colons of DSS-induced O-VDR mice  
270 compared to that in O-VDR<sup>loxP</sup> mice (**Fig. 7I**).

271

272 .

273

274 **Discussion**

275 In the current study, we determined that low colonic VDR expression was significantly  
276 correlated with the reduction of Claudin-5 in human CRC, and we demonstrated that VDR is  
277 important for the maintenance of cellular and physiological levels of TJ protein Claudin-5 in  
278 the colon to prevent inflammation and tumorigenesis. Our study further revealed a complex  
279 role for vitamin D/VDR regulation of *CLDN-5* in the development of colon cancer. Lack of  
280 VDR led to a reduction of Claudin-5 in tumors, and enhancing VDR increased Claudin-5 to  
281 protect the intestinal epithelial cells from tumorigenesis. At the molecular level, our data  
282 have demonstrated that the *CLDN-5* gene is a newly discovered downstream target of the  
283 transcriptional factor VDR. Overall, we noted a link between VDR signaling and barrier  
284 functions in CRC, thus suggesting a potential biomarker and target for a novel therapeutic  
285 strategy. Our study provides insight into how VDR signaling is involved in the tissue barrier  
286 related to tumorigenesis.

287

288 The intestinal barrier includes several elements that aid in its function as a physical and  
289 immunological barrier. These elements include the intestinal microbiota, secretory  
290 immunoglobulin A, antimicrobial peptides, the inner lamina propria, and epithelial cells. At  
291 the cellular level, epithelial cells play physical and physiological roles in health and disease.  
292 VDR signaling is involved in the epithelial barrier function related to various human  
293 diseases and remains largely unexplored [37]. As a nuclear receptor, VDR mediates most  
294 known functions of 1,25-dihydroxyvitamin D (1,25(OH)<sub>2</sub>D<sub>3</sub>), the active form of vitamin D [4].  
295 However, the role of VDR has rarely been evaluated in studies examining human colon

296 cancer. A recent study among patients with digestive tract cancer and vitamin D  
297 supplementation determined that when compared to placebo, this treatment did not result in  
298 significant improvement in relapse-free survival at 5 years [38]. The dosage of vitamin D3  
299 was insufficient among participants who possessed more severe deficiencies at baseline.  
300 Therefore, the status of the VDR level must to be considered over the course of many trials  
301 or as a biological measurement to clarify the underlying mechanisms. The traditional model  
302 of treatment using vitamin D that guided early vitamin studies should give way to a model  
303 incorporating more complex mechanisms of action of the vitamin D/VDR system. The  
304 intestinal barrier has been investigated by various methods, but correlation of results across  
305 studies is difficult, representing a major shortcoming in the field [39].

306

307 The current study provides important insights into how VDR regulates Claudin-5 expression  
308 under normal physiological conditions and during tumor growth in the colon. We revealed a  
309 positive correlation between VDR and Claudin-5 at the mRNA and protein levels in healthy  
310 and tumor colons, thus suggesting the unique role of Claudin-5 in the intestine. There are  
311 27 claudin family members that contribute to tight junctions [40], and not all claudins are the  
312 same. Claudin-2- and Claudin-12 form paracellular  $\text{Ca}^{2+}$  channels in intestinal epithelia and  
313 are important for vitamin D-dependent calcium homeostasis [41]. Our previous studies  
314 have shown that Claudin-2 is hyperregulated in colitis with VDR reduction [42, 43]. Our  
315 current study has demonstrated the mechanism on VDR-dependent function of Claudin-5 in  
316 the intestine. Interestingly, we found that the tight junction Claudin-7 was not altered in  
317 response to VDR-deficient status in the colon. In the lungs, VDR may play an important role

318 in maintaining the pulmonary barrier integrity. We have reported that VDR deletion could  
319 increase lung permeability by altering the expression of TJ molecules, particularly  
320 Claudin-2, -4, -10, -12, and -18 [44]. Abnormal gut barrier function may serve as a  
321 biomarker for the risk of IBD onset [45]. Our findings also suggest that the positively  
322 correlated status of VDR and Claudin-5 could be potentially applied to risk assessment,  
323 early detection, and prevention of CRC, including colitis-associated colon cancer.

324

325 Colorectal cancer is the second-leading cause of cancer-related death and is most curable  
326 in its early stages. Remarkable progress has been made in regard to colon cancer therapy,  
327 including targeting barrier functions and microbiome [46]. The anti-TNF era has revealed  
328 that mucosal healing is a key goal for therapy that predicts clinical remission and  
329 resection-free survival in cancer patients. Many new targets (e.g., Jak inhibition, Toll-like  
330 receptor 9 stimulation, and the addressin mucosal vascular addressin cell adhesion  
331 molecule 1 emerge) have been recently tested for induction of mucosal healing and  
332 protection and for induction and maintenance of remission in IBD. We aimed to provide a  
333 detailed understanding of how VDR status contributes to changes in TJs in the context of  
334 intestinal inflammation and colon cancer. Currently, there are no guidelines for monitoring  
335 vitamin D status, treating hypovitaminosis D, and maintaining optimal vitamin D stores in  
336 patients with IBD [47] or in CRC. These tasks may prove particularly difficult due to  
337 malabsorption, gastrointestinal losses, and increased permeability that are associated with  
338 intestinal dysfunction. Based on the research progress regarding the novel roles of VDR in  
339 intestinal immunity and barrier functions, we expect that studies on VDR in intestinal

340 barriers of colitis and colon cancer will have a marked impact on the prevention, diagnosis,

341 and therapy of colitis and colon cancer patients.

342

## 343 **Materials and Methods**

### 344 **Human tissue samples**

345 This study was performed in accordance with approval from the University of Rochester  
346 Ethics Committee (RSRB00037178) and UIC Ethics Committee (Institutional Review  
347 Board: 2017-0384). Colorectal tissue samples were obtained from 10 CRC patients with  
348 neoplasia and 10 patients without neoplasia patients (49–74years old). Human tissues for  
349 organoids are from healthy volunteers.

350

### 351 **Gene expression datasets**

352 For expression analyses, we used microarray data reported in the NCBI Gene Expression  
353 Omnibus database (GEO). To find the correlation between VDR and Claudin-5 at the gene  
354 expression level, we gathered data by searching the Gene Expression Omnibus  
355 (<https://www.ncbi.nlm.nih.gov/geo/>) for expression profiling studies using colonic samples  
356 from colon cancer subjects. We randomly identified the GEO database reference series:  
357 GSE4183 [48] , GSE8671 [49], GSE10714 [50] and GSE37283) [51]. In these studies, the  
358 authors performed microarray analysis using colonic biopsy samples from healthy controls  
359 as well as from the inflamed and non-inflamed colonic mucosa from CRC subjects. From  
360 the databases, 40 healthy controls and 62 CRC patients were randomly selected for CRC  
361 group, while 16 healthy controls and 18 Colitis-associated CRC were randomly selected for  
362 colitis-associated group. Both were subjected to further analyses.

363

364



365 **Animals**

366 VDR<sup>-/-</sup> mice on a C57BL/6 background were obtained by breeding heterozygous VDR<sup>+/-</sup>  
367 mice[43]. VDR<sup>ΔIEC</sup> mice were obtained by crossing the VDR<sup>LoxP-B</sup> mice, originally provided  
368 by Dr. Geert Carmeliet, with villin-cre mice (Jackson Laboratory, 004586), as we previously  
369 reported [52].

370

371 Intestinal-specific VDR-overexpressing (O-VDR) mice were generated in C57BL/6 mice  
372 strain background. The mouse VDR (mVDR) sequence was cloned into the Stb13 vector  
373 (size 6631 bp). The mVDR was cloned in (from ~2210 bp to ~3316bp) under EF1A  
374 promoter (1bp to 1105bp). A LoxP site was integrated after EF1A promoter (from 1105 bp  
375 to 2210 bp). VDR expression in O-VDR mice is Cre driven [53]. This O-VDR<sup>loxP</sup> mouse line  
376 is labeled as O-VDR<sup>loxP</sup> in our gain of function study to distinct from the VDR<sup>loxP/loxP</sup> mouse  
377 made for VDR<sup>ΔIEC</sup> mice.

378

379 Experiments were performed on 2–3 months old mice including male and female. Mice  
380 were provided with water ad libitum and maintained in a 12 h dark/light cycle. The animal  
381 work was approved by the Rush University Animal Resources committee and UIC Office of  
382 Animal Care. The animal work was approved by the UIC Office of Animal Care (ACC  
383 15-231,17-218, and 18-216).

384

385 **Induction of colon cancer by AOM-DSS in mice**

386 Mice were treated with 10mg/kg of AOM (Sigma-Aldrich, Milwaukee, WI, USA) by  
387 intraperitoneal injection as previously described [24]. After a 7-day recovery period, mice  
388 received three cycles of 2% DSS in the drinking water. Tumor counts and measurements  
389 were performed in a blinded fashion under a stereo-dissecting microscope (Nikon  
390 SMZ1000, Melville, NY, USA). Microscopic analysis was performed for severity of  
391 inflammation and dysplasia on hematoxylin and eosin-stained 'Swiss rolled' colons by a  
392 gastrointestinal pathologist blinded to treatment conditions. Mice were scarified under  
393 anaesthesia.

394

#### 395 **Induction of colitis and experimental design**

396 Eight- to ten-week-old mice of a specific genetic background were grouped randomly into  
397 control and DSS treatment groups. Colitis was induced by adding 5% (weight/volume)  
398 dextran sodium sulfate (DSS) (mol. wt 36-50 kD; USB Corporation, Cleveland, OH, USA) to  
399 the drinking water for 7 days. Mice were monitored regularly, and their body weights were  
400 noted every day. All mice were provided a regular chow diet ad libitum. We checked the  
401 effect of DSS on both OVDR mice and compared them with their respective control group.  
402 On day 7, mice were sacrificed, and intestinal tissue and blood samples were harvested for  
403 RNA, protein, immunofluorescence, and cytokine analysis as described in the results  
404 section. The samples were immediately frozen and kept at -80°C until use.

405

#### 406 **Vitamin D<sub>3</sub> treatment *in vivo***

407 C57/BL/6 wild-type mice (6-8-week-old males and females) were gavaged with 1,25 D<sub>3</sub> (0.2  
408 µg/day in 100 µl of corn oil) 3 times a week for 4 weeks, as described in our previous study  
409 [54]. Intestinal tissue was collected following euthanasia.

410

#### 411 **Cell culture**

412 Mouse embryonic fibroblasts (MEF) were isolated from embryonic day 13.5 embryos  
413 generated from VDR<sup>+/-</sup> x VDR<sup>+/-</sup> mouse breeding as previously described (32). VDR<sup>+/+</sup> and  
414 VDR<sup>-/-</sup> MEFs were used in experiments after more than 15 passages when they had been  
415 immortalized. MEFs and SKCO15 cells were grown in high glucose Dulbecco's Modified  
416 Eagle Medium (DMEM) (Hyclone, SH30243.01) containing 10% (v/v) fetal bovine serum  
417 (GEMINI, 900-108), 50 µg/ml streptomycin, and 50 U/ml penicillin (Mediatech, Inc.,  
418 30-002CI), as previously described [55].

419

#### 420 **Colonoids cultures and treatment with Vit D3**

421 Human colonoids were prepared and maintained as previously described [56]. Mini gut  
422 medium (advanced DMEM/F12 supplemented with HEPES, L-glutamine, N2, and B27) was  
423 added to the culture, along with R-Spondin, Noggin, EGF, and Wnt-3a. At day 7 after  
424 passage, colonoids were treated by Vit D3 (20 nM) for indicated times.

425

#### 426 **Western blot analysis and antibodies**

427 Mouse colonic epithelial cells were collected by scraping the tissue from the colon of the  
428 mouse, including the proximal and distal regions [52]. The cells were sonicated in lysis

429 buffer (10 mM Tris, pH 7.4, 150 mM NaCl, 1 mM EDTA, 1 mM EGTA, pH 8.0, 1% Triton  
430 X-100) with 0.2 mM sodium ortho-vanadate, and protease inhibitor cocktail. The protein  
431 concentration was measured using the BioRad Reagent (BioRad, Hercules, CA, USA).  
432 Cultured cells were rinsed twice with ice-cold HBSS, lysed in protein loading buffer (50 mM  
433 Tris, pH 6.8, 100 mM dithiothreitol, 2% SDS, 0.1% bromophenol blue, 10% glycerol), and  
434 then sonicated. Equal amounts of protein were separated by SDS-polyacrylamide gel  
435 electrophoresis, transferred to nitrocellulose, and immunoblotted with primary antibodies.  
436 The following antibodies were used: anti-Claudin-5 (Invitrogen, 35-2500, Carlsbad, CA,  
437 USA), anti-Claudin-7 (Invitrogen, 34-9100, Carlsbad, CA, USA), anti-VDR (Santa Cruz  
438 Biotechnology, SC-13133, Dallas, TX, USA), anti-Villin (Santa Cruz Biotechnology,  
439 SC-7672 Dallas, TX, USA), or anti- $\beta$ -actin (Sigma-Aldrich, A5316, St. Louis, MO, USA)  
440 antibodies and were visualized by ECL (Thermo Fisher Scientific, 32106, Waltham, MA,  
441 USA). Membranes that were probed with more than one antibody were stripped before  
442 re-probing.

443

#### 444 **Immunofluorescence**

445 Colonic tissues were freshly isolated and embedded in paraffin wax after fixation with 10%  
446 neutral buffered formalin. Immunofluorescence was performed on paraffin-embedded  
447 sections (4  $\mu$ m), after preparation of the slides as described previously [52], [55] followed by  
448 incubation for 1 hour in blocking solution (2% bovine serum albumin, 1% goat serum in  
449 HBSS) to reduce nonspecific background. The tissue samples were incubated overnight  
450 with primary antibodies at 4°C. The following antibodies were used: anti-Claudin-5 and

451 anti-Claudin-7. Slides were washed 3 times for 5 minutes each at room temperature in  
452 wash buffer. Samples were then incubated with secondary antibodies (goat anti-rabbit  
453 Alexa Fluor 488, Molecular Probes, CA; 1:200) for 1 hour at room temperature. Tissues  
454 were mounted with SlowFade Antifade Kit (Life technologies, s2828, Grand Island, NY,  
455 USA), followed by a coverslip, and the edges were sealed to prevent drying. Specimens  
456 were examined with a Zeiss laser scanning microscope LSM 710 (Carl Zeiss Inc.,  
457 Oberkochen, Germany).

458

#### 459 **Immunohistochemistry (IHC)**

460 After preparation of the slides, antigen retrieval was achieved by incubation of the slides for  
461 15 min in the hot preheating sodium citrate (pH 6.0) buffer, and 30 min of cooling at room  
462 temperature. Endogenous peroxidases were quenched by incubating the slides in 3%  
463 hydrogen peroxide for 10 min, followed by three rinses with HBSS, and incubation for 1  
464 hour in 3% BSA + 1% goat serum in HBSS to reduce nonspecific background. Primary  
465 antibodies VDR (1:300) was applied for overnight in a cold room. After three rinses the  
466 slides with HBSS, they were incubated in secondary antibody (1:100, Jackson  
467 ImmunoResearch Laboratories, Cat.No.115-065-174, West Grove, PA, USA) for 1 hour at  
468 room temperature. After washing with HBSS for 10 minutes, the slides were incubated with  
469 vectastain ABC reagent (Vector Laboratories, Cat.No. PK-6100, Burlingame, CA 94010,  
470 USA) for 1 hour. After washing with HBSS for five minutes, color development was  
471 achieved by applying peroxidase substrate kit (Vector Laboratories, Cat.No. SK-4800,  
472 Burlingame, CA 94010) for 2 to 5 minutes, depending on the primary antibody. The duration

473 of peroxidase substrate incubation was determined through pilot experiments and was then  
474 held constant for all of the slides. After washing in distilled water, the sections were  
475 counterstained with haematoxylin (Leica, Cat.No.3801570, Wetzlar, Germany), dehydrated  
476 through ethanol and xylene, and cover-slipped using a permount (Fisher Scientific,  
477 Cat.No.SP15-100, Waltham, MA, USA ).

478

### 479 **Real Time quantitative PCR**

480 Total RNA was extracted from epithelial cell monolayers or mouse colonic epithelial cells  
481 using TRIzol reagent (Fisher Scientific, 15596026, Waltham, MA, USA) [52]. RNA reverse  
482 transcription was done using the iScript cDNA synthesis kit (Bio-Rad Laboratories,  
483 1708891) according to the manufacturer's directions. The RT-cDNA reaction products were  
484 subjected to quantitative real-time PCR using the CFX96 Real time PCR detection system  
485 (Bio-Rad Laboratories, Hercules, CA, USA) and iTaq™ Universal SYBR green supermix  
486 (Bio-Rad Laboratories, 1725121, Hercules, CA, USA) according to the manufacturer's  
487 directions. All expression levels were normalized to  $\beta$ -actin levels of the same sample.  
488 Percent expression was calculated as the ratio of the normalized value of each sample to  
489 that of the corresponding untreated control cells. All real-time PCR reactions were  
490 performed in triplicate. Primer sequences were designed using Primer-BLAST or were  
491 obtained from Primer Bank primer pairs listed in **Table 1**.

492

### 493 **Chromatin immunoprecipitation (CHIP) assay**

494 Binding of VDR to the Claudin-5 promoter was investigated using the ChIP assay as  
495 described previously [57]. Briefly, mouse colonic epithelial cells were collected by scraping  
496 the tissue from the colon of the mouse, cells were treated with 1% formaldehyde for 10 min  
497 at 37°C. Cells were washed twice in ice-cold phosphate buffered saline containing protease  
498 inhibitor cocktail tablets. Cells were scraped into conical tubes, pelleted and lysed in SDS  
499 Lysis Buffer. The lysate was sonicated to shear DNA into fragments of 200–1000 bp (4  
500 cycles of 10 s sonication, 10 s pausing, Branson Sonifier 250, USA). The chromatin  
501 samples were pre-cleared with salmon sperm DNA–bovine serum albumin-sepharose  
502 beads, then incubated overnight at 4 °C with VDR antibody. Immune complexes were  
503 precipitated with salmon sperm DNA-bovine serum albumin-sepharose beads. DNA was  
504 prepared by treatment with proteinase K, extraction with phenol and chloroform, and  
505 ethanol precipitation.

506

#### 507 **Multiplex ELISA assay**

508 A mouse-specific ProcartaPlex™ Multiplex Immunoassay (26) plate from Invitrogen  
509 Thermo Fisher Scientific was used to detect serum cytokine levels. The assay was  
510 performed using the manufacturer's instruction manual using proper standards. Eventually,  
511 the plate was read using a Megpix Luminex machine.

512

#### 513 **Test fecal VDR by PCR**

514 Total RNA was extracted from mouse fecal samples, as previously described.[58] Briefly,  
515 About 100 mg of Frozen fecal pellet was used for RNA extraction by using Trizol Reagent

516 (Thermo Fisher Scientific, Cat.No.15596018, Waltham, MA, USA). To increase RNA yield  
517 in high quality, RNeasy minispin column (Qiagen, Cat No.217004, Hilden, Germany) was  
518 used by following the manufacturer's instructions.

519

## 520 **Statistical Analysis**

521 All data are expressed as the mean  $\pm$  SD. All statistical tests were 2-sided. All  $p$  values <  
522 0.05 were considered statistically significant. After the Shapiro-Wilk test confirmed that the  
523 data are normally distributed, the differences between samples were analyzed using  
524 unpaired  $t$  test for two groups and using one-way ANOVA for more than two groups as  
525 appropriate, respectively. The  $p$  values in ANOVA analysis and generalized linear mixed  
526 models were adjusted using the Tukey method to ensure accurate results. Pairwise  
527 correlation analyses and scatter plots were conducted staining intensity changes between  
528 VDR protein and Claudin-5, using SAS version 9.4 (SAS Institute, Inc., Cary, NC, USA).  
529 Other statistical analyses were performed using GraphPad Prism 6 (GraphPad, Inc., San  
530 Diego, CA., USA).

531

532



533 **Tables**

534

**Table 1: Real-time PCR Primers**

| <b>Primers name</b> | <b>Sequence</b>               |
|---------------------|-------------------------------|
| m $\beta$ -actinF   | 5'-TGTTACCAACTGGGACGACA-3'    |
| m $\beta$ -actinR   | 5'-CTGGGTCATCTTTTCACGGT-3'    |
| mVDRF               | 5'-GAATGTGCCTCGGATCTGTGG-3'   |
| mVDRR               | 5'-ATGCGGCAATCTCCATTGAAG-3'   |
| mClaudin-5F         | 5'-AGGCACGGGTAGCACTCACG-3'    |
| mClaudin-5R         | 5'-CATAGTTCTTCTTGTCGTAATC-3'  |
| mClaudin-7F         | 5'-GCGACAACATCATCACAGCC-3'    |
| mClaudin-7R         | 5'-CCTTGGAGGAATTGGACTTGG-3'   |
| mTNF- $\alpha$ F    | 5'-CCCTCACACTCAGATCATCTTCT-3' |
| mTNF- $\alpha$ R    | 5'-GCTACGACGTGGGCTACAG-3'     |
| mIL-1 $\beta$ F     | 5'-GCAACTGTTCTGAACTCAACT-3'   |
| mIL-1 $\beta$ R     | 5'-ATCTTTTGGGGTCCGTCAACT-3'   |
| mIL-17F             | 5'-TTTAACTCCCTTGCGCAAAA-3'    |
| mIL-17R             | 5'-CTTTCCCTCCGCATTGACAC-3'    |
| h $\beta$ -actinF   | 5'-AGAGCAAGAGAGGCATCCTC-3'    |
| h $\beta$ -actinR   | 5'-CTCAAACATGATCTGGGTCA-3'    |
| hVDRF               | 5'-GGACTGCCGCATCACCAA-3'      |
| hVDRR               | 5'-TCATCTCCCGCTTCTCT-3'       |
| hClaudin-5F         | 5'-TTCGCCAACATTGTCGTCC-3'     |
| hClaudin-5R         | 5'-TCTTCTTGTCGTAGTCGCCG-3'    |
| hClaudin-7F         | 5'-CATCGTGGCAGGTCTTGCC-3'     |
| hClaudin-7R         | 5'-GATGGCAGGGCCAAACTCATAC-3'  |

535

536 **Figure Legends**

537 **Fig. 1 Reduced VDR was correlated with low Claudin-5 expression in human CRC**  
538 **patients**

539 **(A)** Reduced VDR and Claudin-5 expression in patients with CRC (GEO database  
540 GSE4183 and GSE8671 (data were expressed as mean  $\pm$  SD; Normal, n=40; CRC, n=62;  
541 student t test, \* P < 0.05). **(B)** Significantly coordinated expression of VDR and Claudin-5 in  
542 biopsy samples collected from CRC patients. We performed a regression of VDR against  
543 Claudin-5 and conducted a scatter plot analysis with a regression line (GEO database  
544 GSE4183 and GSE8671, Normal, n=40; CRC, n=62; Intercept = 0.244; Slope = 0.5297).  
545 Values for healthy controls are presented in blue and values for CRC patients are  
546 presented in red. **(C)** Reduced VDR and Claudin-5 expression in patients with  
547 Colitis-associated CRC (GEO database GSE8671, GSE10714 and GSE37283 (data were  
548 expressed as mean  $\pm$  SD; Normal, n=16; Colitis-associated CRC, n=18; student t test, \* P <  
549 0.05). **(D)** Coordinated expression of VDR and Claudin-5 in biopsy samples collected from  
550 Colitis-associated CRC patients. We performed a regression of VDR against Claudin-5 and  
551 conducted a scatter plot analysis with a regression line (GEO database GSE8671,  
552 GSE10714 and GSE37283 Normal, n=16; Colitis-associated CRC, n=18; the correlation is  
553 0.2549 with p-value = 0.1457). **(E)** Intestinal VDR staining in normal and CRC human colon  
554 samples. Compared to normal intestines, intestines from CRC patients possessed  
555 significantly lower VDR expression. (Images are representative of experiments performed  
556 in triplicate; Normal, n=10; Colorectal cancer, n=10; Student t test; \*P < 0.05). **(F)** IF  
557 staining of Claudin-5 in normal and CRC human colon samples. Compared to normal

558 intestines, the intestines of CRC patients exhibited significantly lower Claudin-5 expression.  
559 (Images are representative of experiments in triplicate; Normal, n=10; Colon cancer, n=10;  
560 Student *t* test; \**P* < 0.05). **(G)** The correlation analysis of staining intensity between  
561 intestinal Claudin-5 and VDR in human colon samples. (*P* < 0.0734, n = 6 for Normal and  
562 Colon cancer, respectively).

563

564 **Fig. 2 VDR<sup>-/-</sup> mice developed a greater number of tumors compared to tumors in**  
565 **VDR<sup>+/+</sup> mice.**

566 **(A)** Schematic overview of the AOM/DSS-induced colon cancer model. AOM (10 mg/kg)  
567 was injected on day 0. At Day 7, 2% DSS solution was administered to mice in drinking  
568 water. Seven days of DSS was followed by three weeks of drinking water that was free of  
569 DSS. An additional two cycles of DSS were administered prior to scarification at Week 19.

570 **(B)** Colonic tumors *in situ*. Representative colons from different groups. Tumors are  
571 indicated by red arrows. **(C)** Tumor numbers in AOM-DSS-induced colon cancer model:

572 VDR<sup>+/+</sup> and VDR<sup>-/-</sup> mice (data are expressed as mean ± SD. n = 10-13, one-way ANOVA  
573 test, \**P* < 0.05). **(D)** Max tumor size in AOM-DSS induced colon cancer model: VDR<sup>+/+</sup> and

574 VDR<sup>-/-</sup> mice (data are expressed as mean ± SD. n = 10-13, one-way ANOVA test,  
575 \**P* < 0.05). **(E)** Representative H&E staining of “Swiss rolls” of representative colons from

576 the indicated groups. Images are from a single experiment and are representative of 10  
577 mice per group. **(F)** Quantitation of PCNA-positive cells in control mucosa per intestinal

578 glands or in the tumors tissue per high-power field. PCNA expression in the tumor tissue of  
579 VDR<sup>-/-</sup> mice was significantly higher, compared to that in the VDR<sup>+/+</sup> mice (data are

580 expressed as mean  $\pm$  SD. n = 5, student's t-test, \*P < 0.05). **(G)** Serum cytokines such as  
581 TNF- $\alpha$ , IL-1 $\beta$ , and IL-17 were significantly increased, particularly in the AOM-DSS-induced  
582 VDR<sup>-/-</sup> mice colon cancer model. Each single experiment was assayed in triplicate. Data are  
583 expressed as mean  $\pm$  SD. n = 6, one-way ANOVA test, \*P < 0.05.

584

### 585 **Fig. 3 VDR deletion led to decreased Claudin-5 expression in tumor tissues**

586 **(A)** Intestine permeability increased in the AOM-DSS-induced VDR<sup>-/-</sup> mice colon cancer  
587 model. Fluorescein Dextran (Molecular weight 3 kDa, diluted in HBSS) was gavaged (50  
588 mg/g mouse). Four hours later, mouse blood samples were collected for fluorescence  
589 intensity measurement (data are expressed as mean  $\pm$  SD; n = 5 mice/group, 1-way  
590 ANOVA test; \*P < 0.05). **(B)** VDR deletion decreased Claudin-5 at the mRNA level in the  
591 colon (data are expressed as mean  $\pm$  SD. n = 5, one-way ANOVA test, \*P < 0.05). **(C)** VDR  
592 deletion decreased Claudin-5 at the protein level in the colon (data are expressed as mean  
593  $\pm$  SD. n = 5, one-way ANOVA test, \*P < 0.05). **(D) (G)** Claudin-5 was decreased in the  
594 tumor tissue of VDR<sup>-/-</sup> mice, compared to levels in the tumor tissue of VDR<sup>+/+</sup> mice  
595 according to immunofluorescence staining. Images are from a single experiment and are  
596 representative of 6 mice per group. (Data are expressed as mean  $\pm$  SD. n = 6, one-way  
597 ANOVA test, \*P < 0.05). **(E)** Claudin-7 was unchanged in the tumor tissue of VDR<sup>-/-</sup> mice  
598 compared to levels in the tumor tissue of VDR<sup>+/+</sup> mice according to immunofluorescence  
599 staining. Images are from a single experiment and are representative of 6 mice per group.  
600 **(F)(H)** Intestinal VDR expression was decreased in the AOM-DSS-induced colon cancer  
601 model. Images are from a single experiment and are representative of 6 mice per group.

602 Data are expressed as mean  $\pm$  SD.  $n = 6$ , one-way ANOVA test,  $*P < 0.05$ ). **(I)** VDR levels  
603 in fecal samples were detected using RT-PCR. VDR expression was downregulated in the  
604 AOM-DSS-treated VDR<sup>+/+</sup> mice (data are expressed as mean  $\pm$  SD.  $n = 5$ , one-way  
605 ANOVA test,  $*P < 0.05$ ).

606

607 **Fig. 4 VDR-specific deletion in mouse intestines lead to decreased Claudin-5**  
608 **expression in tumor tissues**

609 **(A)** Intestine permeability was increased in the AOM-DSS-induced VDR <sup>$\Delta$ IEC</sup> mice colon  
610 cancer model (data are expressed as mean  $\pm$  SD;  $n = 5$  mice/group, 1-way ANOVA test;  
611  $*P < 0.05$ ). **(B)** VDR-specific deletion in mouse intestines decreased Claudin-5 at the  
612 mRNA level in the colon (data are expressed as mean  $\pm$  SD.  $n = 5$ , one-way ANOVA test,  
613  $*P < 0.05$ ). **(C)** VDR-specific deletion in mouse intestines decreased Claudin-5 protein in  
614 the colon (data are expressed as mean  $\pm$  SD.  $n = 5$ , one-way ANOVA test,  $*P < 0.05$ ). **(D)**  
615 Claudin-5 was decreased in the tumor tissue of VDR <sup>$\Delta$ IEC</sup> mice compared to levels in the  
616 tumor tissue of VDR<sup>loxP</sup> mice according to immunofluorescence staining. Images are from a  
617 single experiment and are representative of 6 mice per group. **(E)** Claudin-7 expression  
618 was not changed in the AOM-DSS-induced VDR<sup>loxP</sup> mice colon cancer model. Images are  
619 from a single experiment and are representative of 6 mice per group. **(F)** Intensity of the  
620 staining of Claudin-5. (Data are expressed as mean  $\pm$  SD.  $n = 6$ , one-way ANOVA test,  
621  $*P < 0.05$ ). **(G)** VDR level in fecal samples was detected by RT-PCR. VDR expression was  
622 downregulated in the AOM-DSS-treated VDR<sup>loxP</sup> mice (data are expressed as  
623 mean  $\pm$  SD.  $n = 3$ , one-way ANOVA test,  $*P < 0.05$ ).

624

625 **Fig. 5. VDR binds to the Claudin-5 promoter *in vivo* and *in vitro***

626 **(A)** CHIP-PCR amplification demonstrated that VDR binds to the promoter regions of  
627 Claudin-5 in mouse colons. PCR assays were performed and included input-positive  
628 controls and IgG/villin-negative controls.  $n = 3$  separate experiments. **(B)** Claudin-5  
629 promoter regions with VDRE sequence. **(C)** Claudin-5 knockdown using siRNA (40 nM for  
630 72 hours) did not reduce VDR expression at the mRNA level. (Data are expressed as  
631 mean  $\pm$  SD.  $n = 3$ , one-way ANOVA test,  $*P < 0.05$ ). **(D)** The protein expression in  
632 SKCO15 cells using siRNA (40 nM for 72 hours). (data are expressed as mean  $\pm$  SD.  $n = 3$ ,  
633 one-way ANOVA test,  $*P < 0.05$ ).

634

635 **Fig. 6. High VDR levels led to increased Claudin-5 at the protein and mRNA levels *in***  
636 ***vitro*.**

637 **(A)** Claudin-5 mRNA and **(B)** protein levels were increased after 24-hour vitamin  
638 D3 treatment at 20 nM in SKCO15 cells (data are expressed as mean  $\pm$  SD. student's t-test,  
639  $*P < 0.05$ .  $n = 3$ ). **(C)** Claudin-5 mRNA and **(D)** protein levels were higher in vitamin  
640 D3-treated VDR<sup>+/+</sup> mice. VDR<sup>+/+</sup> mice (6-8 weeks) were gavaged by 0.2  $\mu$ g vitamin D3 in  
641 0.1 ml corn oil for 3 times per week for 4 weeks (data are expressed as mean  $\pm$  SD.  
642 student's t-test,  $*P < 0.05$ .  $n = 5$  mice / group). **(E)** The micrographs show representative  
643 human colonoids that were treated with Vit D<sub>3</sub> (20 nM) for the indicated time points. **(F)**  
644 Claudin-5 mRNA and **(G)** protein levels were increased after vitamin D3 treatment in

645 human colonoids (data are expressed as mean  $\pm$  SD, n = 5, one-way ANOVA test,  
646 \*P < 0.05).

647

648 **Fig. 7. Overexpressed intestinal epithelial VDR led to increased Claudin-5 and**  
649 **reduced inflammation *in vivo*.**

650 **(A)** VDR overexpression in mice intestines increased Claudin-5 expression in the colon at  
651 the mRNA and **(B)** protein levels (data are expressed as mean  $\pm$  SD. n = 3, one-way  
652 ANOVA test, \*P < 0.05). **(C)** Claudin-5 was less decreased at the mRNA and **(D)** protein  
653 levels in the intestinal tissue of O-VDR mice treatment with DSS compared to levels in the  
654 O-VDR<sup>loxp</sup> mice (data are expressed as mean  $\pm$  SD. n = 3, one-way ANOVA test,  
655 \*P < 0.05). **(E)** Claudin-5 was less decreased in the intestinal tissue of O-VDR mice treated  
656 with DSS compared to levels in the O-VDR<sup>loxp</sup> mice, according to immunofluorescence  
657 staining. Images are from a single experiment and are representative of 5 mice per group.  
658 **(F)** Claudin-7 was unchanged in the intestinal tissue of O-VDR mice treated with DSS  
659 compared to levels in the O-VDR<sup>loxp</sup> mice according to immunofluorescence staining.  
660 Images are from a single experiment and are representative of 5 mice per group. **(G)**  
661 Intensity of the staining of Claudin-5. Images are from a single experiment and are  
662 representative of 5 mice per group. (Data are expressed as mean  $\pm$  SD. n = 5, one-way  
663 ANOVA test, \*P < 0.05). **(H)** VDR level in fecal samples was detected by RT-PCR. VDR  
664 expression was less decreased in O-VDR mice treated with DSS compared to levels in the  
665 O-VDR<sup>loxp</sup> mice treated with DSS (data are expressed as mean  $\pm$  SD. n = 3, one-way  
666 ANOVA test, \*P < 0.05). **(I)** The inflammatory cytokines IL-1 $\beta$  and IL-17 were less

667 increased in the DSS-induced O-VDR mice colitis model compare to levels in O-VDR<sup>loxP</sup>

668 mice (data are expressed as mean  $\pm$  SD.  $n = 3$ , one-way ANOVA test, \* $P < 0.05$ ).

669



670 **Fig. S1. VDR deficiency in intestinal epithelial cells of mice leads to the reduction of**  
671 **Claudin-5 at both the mRNA and protein levels *in vivo*.**

672 **(A)** Claudin-5 protein and **(B)** mRNA levels were significantly lower in VDR<sup>-/-</sup> mice compared  
673 to levels in the VDR<sup>+/+</sup> mice (data are expressed as mean ± SD. n = 5, student's t-test,  
674 \*P < 0.05). **(C)** Location of Claudin-5 protein in the colons of VDR<sup>+/+</sup> and VDR<sup>-/-</sup> mice.  
675 Images are from a single experiment and are representative of 5 mice per group. **(D)**  
676 Claudin-5 protein and **(E)** mRNA levels were significantly lower in VDR<sup>ΔIEC</sup> mice compared  
677 to levels in the VDR<sup>loxP</sup> mice (data are expressed as mean ± SD. n = 5, student's t-test,  
678 \*P < 0.05). **(F)** Claudin-5 protein and **(G)** mRNA were both decreased in VDR<sup>-/-</sup> MEF cells  
679 (data are expressed as mean ± SD. n = 3, student's t-test, \*P < 0.05). **(H)** Location and  
680 quantification of Claudin-5 protein in VDR<sup>+/+</sup> and VDR<sup>-/-</sup> MEF cells. Images are from a single  
681 experiment performed in triplicate. (Data are expressed as mean ± SD. n = 3, one-way  
682 ANOVA test, \*P < 0.05).

683

684

685      **References**

- 686      1 Zeissig S, Burgel N, Gunzel D, Richter J, Mankertz J, Wahnschaffe U, *et al.* Changes in  
687 expression and distribution of claudin 2, 5 and 8 lead to discontinuous tight junctions and  
688 barrier dysfunction in active Crohn's disease. *Gut* 2007;**56**:61-72.
- 689      2 Zhu L, Han J, Li L, Wang Y, Li Y, Zhang S. Claudin Family Participates in the  
690 Pathogenesis of Inflammatory Bowel Diseases and Colitis-Associated Colorectal Cancer.  
691 *Frontiers in immunology* 2019;**10**:1441.
- 692      3 Cherradi S, Martineau P, Gongora C, Del Rio M. Claudin gene expression profiles and  
693 clinical value in colorectal tumors classified according to their molecular subtype. *Cancer*  
694 *management and research* 2019;**11**:1337-48.
- 695      4 Haussler MR, Whitfield GK, Haussler CA, Hsieh J-C, Thompson PD, Selznick SH, *et al.*  
696 The nuclear vitamin D receptor: biological and molecular regulatory properties revealed. *J*  
697 *Bone and Mineral Research* 1998;**13**:325-49.
- 698      5 Xue Y, Fleet JC. Intestinal vitamin D receptor is required for normal calcium and bone  
699 metabolism in mice. *Gastroenterology* 2009;**136**:1317-27, e1-2.
- 700      6 Bouillon R, Carmeliet G, Verlinden L, van Etten E, Verstuyf A, Luderer HF, *et al.*  
701 Vitamin D and human health: lessons from vitamin D receptor null mice. *Endocr Rev*  
702 2008;**29**:726-76.
- 703      7 Ogura M, Nishida S, Ishizawa M, Sakurai K, Shimizu M, Matsuo S, *et al.* Vitamin D3  
704 modulates the expression of bile acid regulatory genes and represses inflammation in bile  
705 duct-ligated mice. *J Pharmacol Exp Ther* 2009;**328**:564-70.
- 706      8 Kamen DL, Tangpricha V. Vitamin D and molecular actions on the immune system:  
707 modulation of innate and autoimmunity. *J Mol Med*;**88**:441-50.
- 708      9 Waterhouse JC, Perez TH, Albert PJ. Reversing bacteria-induced vitamin D receptor  
709 dysfunction is key to autoimmune disease. *Ann N Y Acad Sci* 2009;**1173**:757-65.
- 710      10 Liu PT, Krutzik SR, Modlin RL. Therapeutic implications of the TLR and VDR  
711 partnership. *Trends Mol Med* 2007;**13**:117-24.
- 712      11 Gombart AF, Borregaard N, Koeffler HP. Human cathelicidin antimicrobial peptide  
713 (CAMP) gene is a direct target of the vitamin D receptor and is strongly up-regulated in  
714 myeloid cells by 1,25-dihydroxyvitamin D3. *FASEB J* 2005;**19**:1067-77.
- 715      12 Kong J, Zhang Z, Musch MW, Ning G, Sun J, Hart J, *et al.* Novel role of the vitamin  
716 D receptor in maintaining the integrity of the intestinal mucosal barrier. *Am J Physiol*  
717 *Gastrointest Liver Physiol* 2008;**294**:G208-16.
- 718      13 Adams JS, Hewison M. Unexpected actions of vitamin D: new perspectives on the  
719 regulation of innate and adaptive immunity. *Nat Clin Pract Endocrinol Metab* 2008;**4**:80-90.
- 720      14 Yu S, Bruce D, Froicu M, Weaver V, Cantorna MT. Failure of T cell homing,  
721 reduced CD4/CD8 $\alpha$  $\alpha$  intraepithelial lymphocytes, and inflammation in the gut of  
722 vitamin D receptor KO mice. *Proceedings of the National Academy of Sciences of the*  
723 *United States of America* 2008;**105**:20834-9.
- 724      15 Lloyd-Price J, Arze C, Ananthakrishnan AN, Schirmer M, Avila-Pacheco J, Poon  
725 TW, *et al.* Multi-omics of the gut microbial ecosystem in inflammatory bowel diseases.  
726 *Nature* 2019;**569**:655-62.

- 727 16 Abreu MT, Kantorovich V, Vasiliauskas EA, Gruntmanis U, Matuk R, Daigle K, *et*  
728 *al.* Measurement of vitamin D levels in inflammatory bowel disease patients reveals a  
729 subset of Crohn's disease patients with elevated 1,25-dihydroxyvitamin D and low bone  
730 mineral density. *Gut* 2004;**53**:1129-36.
- 731 17 Lim WC, Hanauer SB, Li YC. Mechanisms of disease: vitamin D and inflammatory  
732 bowel disease. *Nat Clin Pract Gastroenterol Hepatol* 2005;**2**:308-15.
- 733 18 Wang TT, Dabbas B, Laperriere D, Bitton AJ, Soualhine H, Tavera-Mendoza LE,  
734 *et al.* Direct and indirect induction by 1,25-dihydroxyvitamin D<sub>3</sub> of the  
735 NOD2/CARD15-defensin beta2 innate immune pathway defective in Crohn disease. *The*  
736 *Journal of biological chemistry*; **285**:2227-31.
- 737 19 Rufo PA, Bousvaros A. Current therapy of inflammatory bowel disease in children.  
738 *Paediatr Drugs* 2006;**8**:279-302.
- 739 20 Sun J. Vitamin D and mucosal immune function. *Curr Opin Gastroenterol*  
740 2010;**26**:591-5.
- 741 21 Song M, Chan AT, Jun J. Features of the Gut Microbiome, Diet, and Environment  
742 That Influence Risk of Colorectal Cancer. *Gastroenterology* 2020.
- 743 22 Lu R, Zhang Y, Xia Y, Zhang J, Kaser A, Blumberg R, *et al.* Paneth cell alertness  
744 to pathogens maintained by vitamin D receptors. *Gastroenterology* 2020.
- 745 23 Zhang Y-G, Lu R, Wu S, Chatterjee I, Zhou D, Xia Y, *et al.* Vitamin D receptor  
746 protects against dysbiosis and tumorigenesis via the JAK/STAT pathway in intestine.  
747 *Biorxiv* 2020;**02**.
- 748 24 Zhang YG, Lu R, Wu S, Chatterjee I, Zhou D, Xia Y, *et al.* Vitamin D Receptor  
749 Protects Against Dysbiosis and Tumorigenesis via the JAK/STAT Pathway in Intestine. *Cell*  
750 *Mol Gastroenterol Hepatol* 2020;**10**:729-46.
- 751 25 Wong SH, Zhao L, Zhang X, Nakatsu G, Han J, Xu W, *et al.* Gavage of Fecal  
752 Samples From Patients With Colorectal Cancer Promotes Intestinal Carcinogenesis in  
753 Germ-Free and Conventional Mice. *Gastroenterology* 2017;**153**:1621-33 e6.
- 754 26 Andoh A, Imaeda H, Aomatsu T, Inatomi O, Bamba S, Sasaki M, *et al.* Comparison  
755 of the fecal microbiota profiles between ulcerative colitis and Crohn's disease using  
756 terminal restriction fragment length polymorphism analysis. *J Gastroenterol*  
757 2011;**46**:479-86.
- 758 27 Bird RP, Good CK. The significance of aberrant crypt foci in understanding the  
759 pathogenesis of colon cancer. *Toxicol Lett* 2000;**112-113**:395-402.
- 760 28 Kang X, Zhang R, Kwong TN, Lui RN, Wu WK, Sung JJ, *et al.* Serrated neoplasia  
761 in the colorectum: gut microbiota and molecular pathways. *Gut Microbes* 2021;**13**:1-12.
- 762 29 Yongguo Zhang YX, Jun Sun. . A simple and sensitive method to detect vitamin D  
763 receptor expression in various disease models using stool samples. *Genes and Diseases*  
764 2020.
- 765 30 Wu S, Zhang YG, Lu R, Xia Y, Zhou D, Petrof EO, *et al.* Intestinal epithelial vitamin  
766 D receptor deletion leads to defective autophagy in colitis. *Gut* 2015;**64**:1082-94.
- 767 31 Sun J, Kong J, Duan Y, Szeto FL, Liao A, Madara JL, *et al.* Increased NF-kappaB  
768 activity in fibroblasts lacking the vitamin D receptor. *Am J Physiol Endocrinol Metab*  
769 2006;**291**:E315-22.

- 770 32 Kato S. The function of vitamin D receptor in vitamin D action. *J Biochem*  
771 2000;**127**:717-22.
- 772 33 Zhang Y-g, Wu S, Lu R, Zhou D, Zhou J, Carmeliet G, *et al.* Tight junction CLDN2  
773 gene is a direct target of the vitamin D receptor. *Scientific Reports* 2015;**5**:10642.
- 774 34 Capaldo CT, Koch S, Kwon M, Laur O, Parkos CA, Nusrat A. Tight function zonula  
775 occludens-3 regulates cyclin D1-dependent cell proliferation. *Molecular biology of the cell*  
776 2011;**22**:1677-85.
- 777 35 Ivanov AI, McCall IC, Babbin B, Samarin SN, Nusrat A, Parkos CA. Microtubules  
778 regulate disassembly of epithelial apical junctions. *BMC cell biology* 2006;**7**:12.
- 779 36 Zhang YG, Zhu X, Lu R, Messer JS, Xia Y, Chang EB, *et al.* Intestinal epithelial  
780 HMGB1 inhibits bacterial infection via STAT3 regulation of autophagy. *Autophagy*  
781 2019;**15**:1935-53.
- 782 37 Zhang YG, Wu S, Sun J. Vitamin D, Vitamin D Receptor, and Tissue Barriers.  
783 *Tissue barriers* 2013;**1**.
- 784 38 Urashima M, Ohdaira H, Akutsu T, Okada S, Yoshida M, Kitajima M, *et al.* Effect of  
785 Vitamin D Supplementation on Relapse-Free Survival Among Patients With Digestive Tract  
786 Cancers: The AMATERASU Randomized Clinical Trial. *JAMA* 2019;**321**:1361-9.
- 787 39 Vancamelbeke M, Vermeire S. The intestinal barrier: a fundamental role in health  
788 and disease. *Expert Rev Gastroenterol Hepatol* 2017;**11**:821-34.
- 789 40 Mineta K, Yamamoto Y, Yamazaki Y, Tanaka H, Tada Y, Saito K, *et al.* Predicted  
790 expansion of the claudin multigene family. *FEBS Letters* 2011;**585**:606-12.
- 791 41 Fujita H, Sugimoto K, Inatomi S, Maeda T, Osanai M, Uchiyama Y, *et al.* Tight  
792 junction proteins claudin-2 and -12 are critical for vitamin D-dependent Ca<sup>2+</sup> absorption  
793 between enterocytes. *Molecular biology of the cell* 2008;**19**:1912-21.
- 794 42 Zhang YG, Lu R, Xia Y, Zhou D, Petrof E, Claud EC, *et al.* Lack of Vitamin D  
795 Receptor Leads to Hyperfunction of Claudin-2 in Intestinal Inflammatory Responses.  
796 *Inflamm Bowel Dis* 2019;**25**:97-110.
- 797 43 Zhang YG, Wu S, Lu R, Zhou D, Zhou J, Carmeliet G, *et al.* Tight junction CLDN2  
798 gene is a direct target of the vitamin D receptor. *Sci Rep* 2015;**5**:10642.
- 799 44 Chen H, Lu R, Zhang YG, Sun J. Vitamin D Receptor Deletion Leads to the  
800 Destruction of Tight and Adherens Junctions in Lungs. *Tissue barriers* 2018;**6**:1-13.
- 801 45 Turpin W, Lee SH, Raygoza Garay JA, Madsen KL, Meddings JB, Bedrani L, *et al.*  
802 Increased Intestinal Permeability is Associated with Later Development of Crohn's Disease.  
803 *Gastroenterology* 2020.
- 804 46 Wong SH, Yu J. Gut microbiota in colorectal cancer: mechanisms of action and  
805 clinical applications. *Nat Rev Gastroenterol Hepatol* 2019;**16**:690-704.
- 806 47 Pappa HM, Grand RJ, Gordon CM. Report on the vitamin D status of adult and  
807 pediatric patients with inflammatory bowel disease and its significance for bone health and  
808 disease. *Inflamm Bowel Dis* 2006;**12**:1162-74.
- 809 48 Galamb O, Gyorffy B, Sipos F, Spisak S, Nemeth AM, Miheller P, *et al.*  
810 Inflammation, adenoma and cancer: objective classification of colon biopsy specimens with  
811 gene expression signature. *Disease markers* 2008;**25**:1-16.

- 812 49 Sabates-Bellver J, Van der Flier LG, de Palo M, Cattaneo E, Maake C, Rehrauer  
813 H, *et al.* Transcriptome profile of human colorectal adenomas. *Molecular cancer research : MCR* 2007;**5**:1263-75.
- 814 50 Galamb O, Sipos F, Solymosi N, Spisak S, Krenacs T, Toth K, *et al.* Diagnostic  
815 mRNA expression patterns of inflamed, benign, and malignant colorectal biopsy specimen  
816 and their correlation with peripheral blood results. *Cancer epidemiology, biomarkers &*  
817 *prevention : a publication of the American Association for Cancer Research, cosponsored*  
818 *by the American Society of Preventive Oncology* 2008;**17**:2835-45.
- 820 51 Pekow J, Dougherty U, Huang Y, Gometz E, Nathanson J, Cohen G, *et al.* Gene  
821 signature distinguishes patients with chronic ulcerative colitis harboring remote neoplastic  
822 lesions. *Inflamm Bowel Dis* 2013;**19**:461-70.
- 823 52 Zhang H, Wu H, Liu L, Li H, Shih DQ, Zhang X. 1,25-dihydroxyvitamin D3  
824 regulates the development of chronic colitis by modulating both T helper (Th)1 and Th17  
825 activation. *APMIS* 2015;**123**:490-501.
- 826 53 Chatterjee I, Zhang Y, Zhang J, Lu R, Xia Y, Sun J. Overexpression of Vitamin D  
827 Receptor in Intestinal Epithelia Protects Against Colitis via Upregulating Tight Junction  
828 Protein Claudin 15. *Journal of Crohn's and Colitis* 05 March, 2021.
- 829 54 Lu R, Zhang YG, Xia Y, Sun J. Imbalance of autophagy and apoptosis in intestinal  
830 epithelium lacking the vitamin D receptor. *FASEB J* 2019:fj201900727R.
- 831 55 Lu R, Wu S, Liu X, Xia Y, Zhang YG, Sun J. Chronic effects of a Salmonella type III  
832 secretion effector protein AvrA in vivo. *PLoS One* 2010;**5**:e10505.
- 833 56 Lu R, Voigt RM, Zhang Y, Kato I, Xia Y, Forsyth CB, *et al.* Alcohol Injury Damages  
834 Intestinal Stem Cells. *Alcoholism, clinical and experimental research* 2017;**41**:727-34.
- 835 57 Wu S, Xia Y, Liu X, Sun J. Vitamin D receptor deletion leads to reduced level of  
836 I kappa B alpha protein through protein translation, protein-protein interaction, and  
837 post-translational modification. *Int J Biochem Cell Biol* 2010;**42**:329-36.
- 838 58 Zhang Y-g, Xia Y, Sun J. A simple and sensitive method to detect vitamin D  
839 receptor expression in various disease models using stool samples. *Genes & Diseases*  
840 2020.
- 841

Figure.1

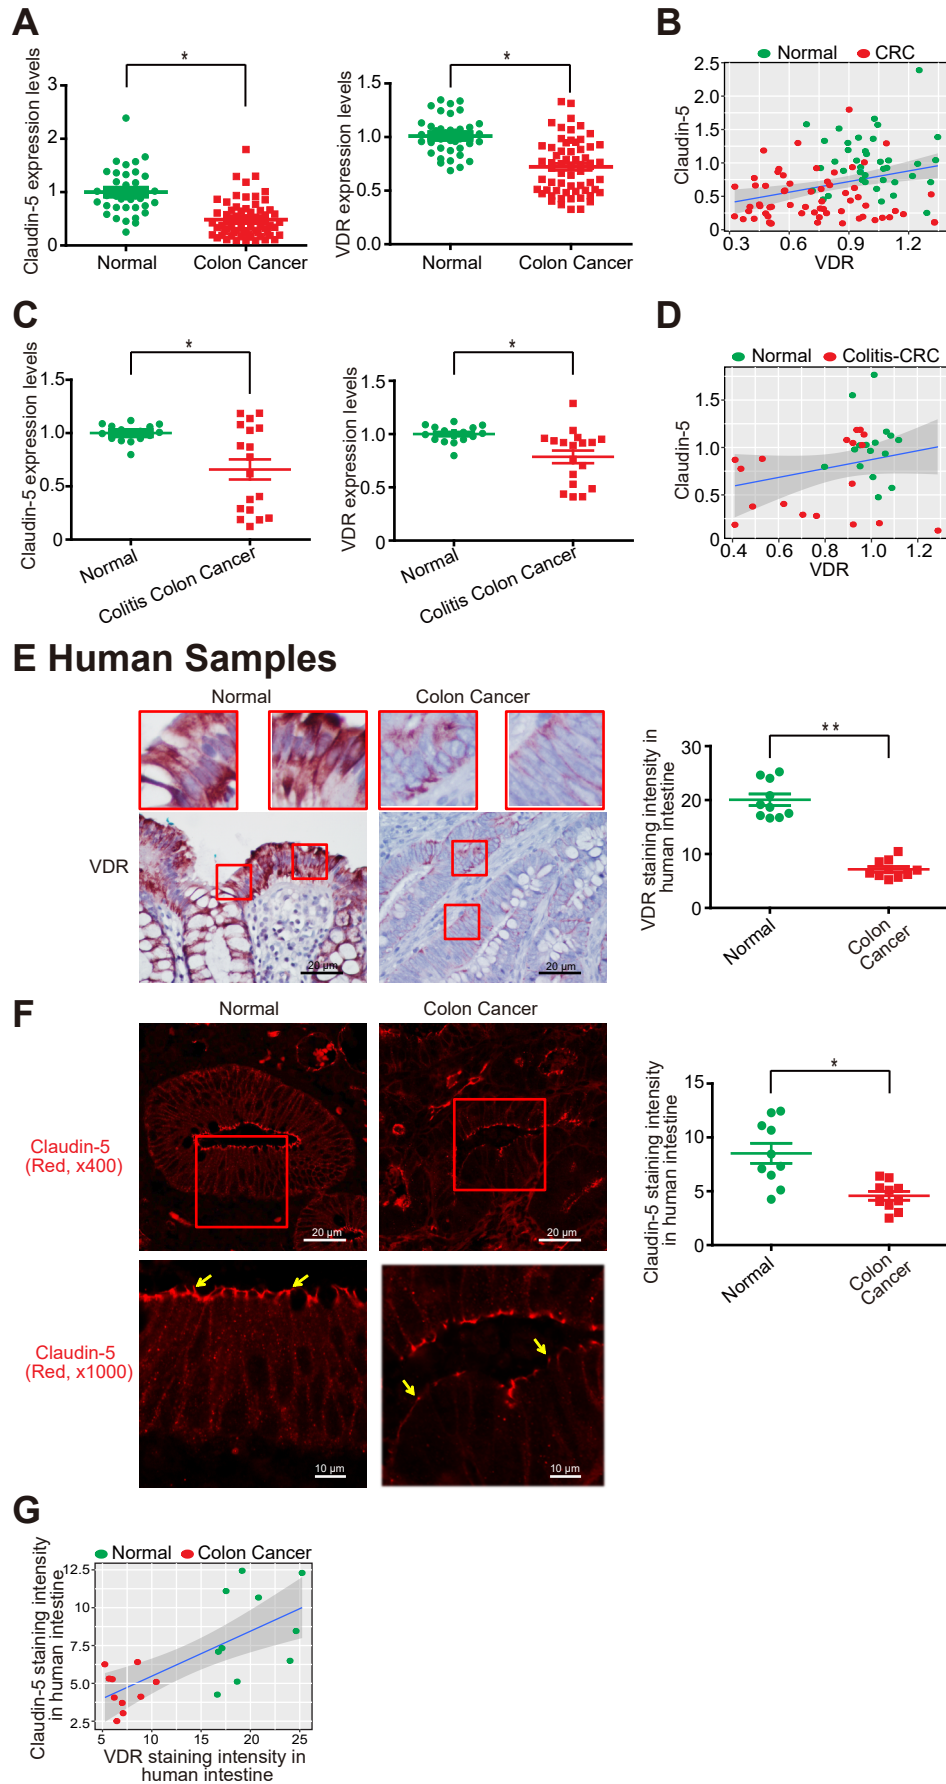





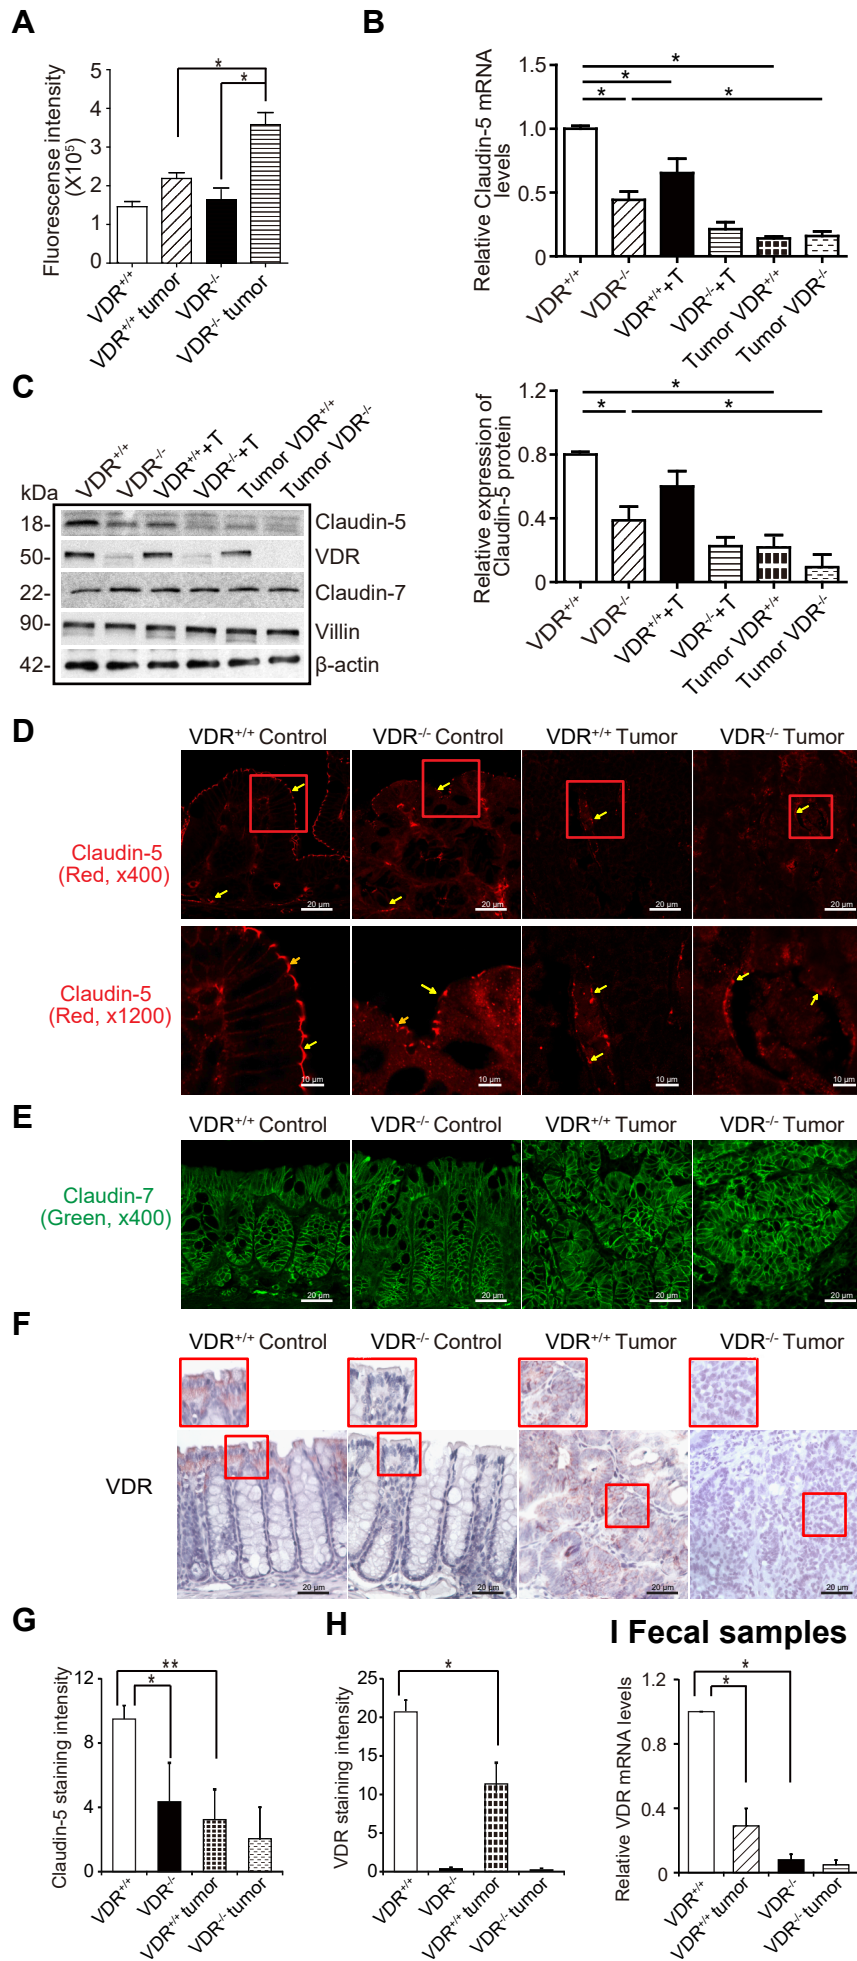



**Figure. 4**

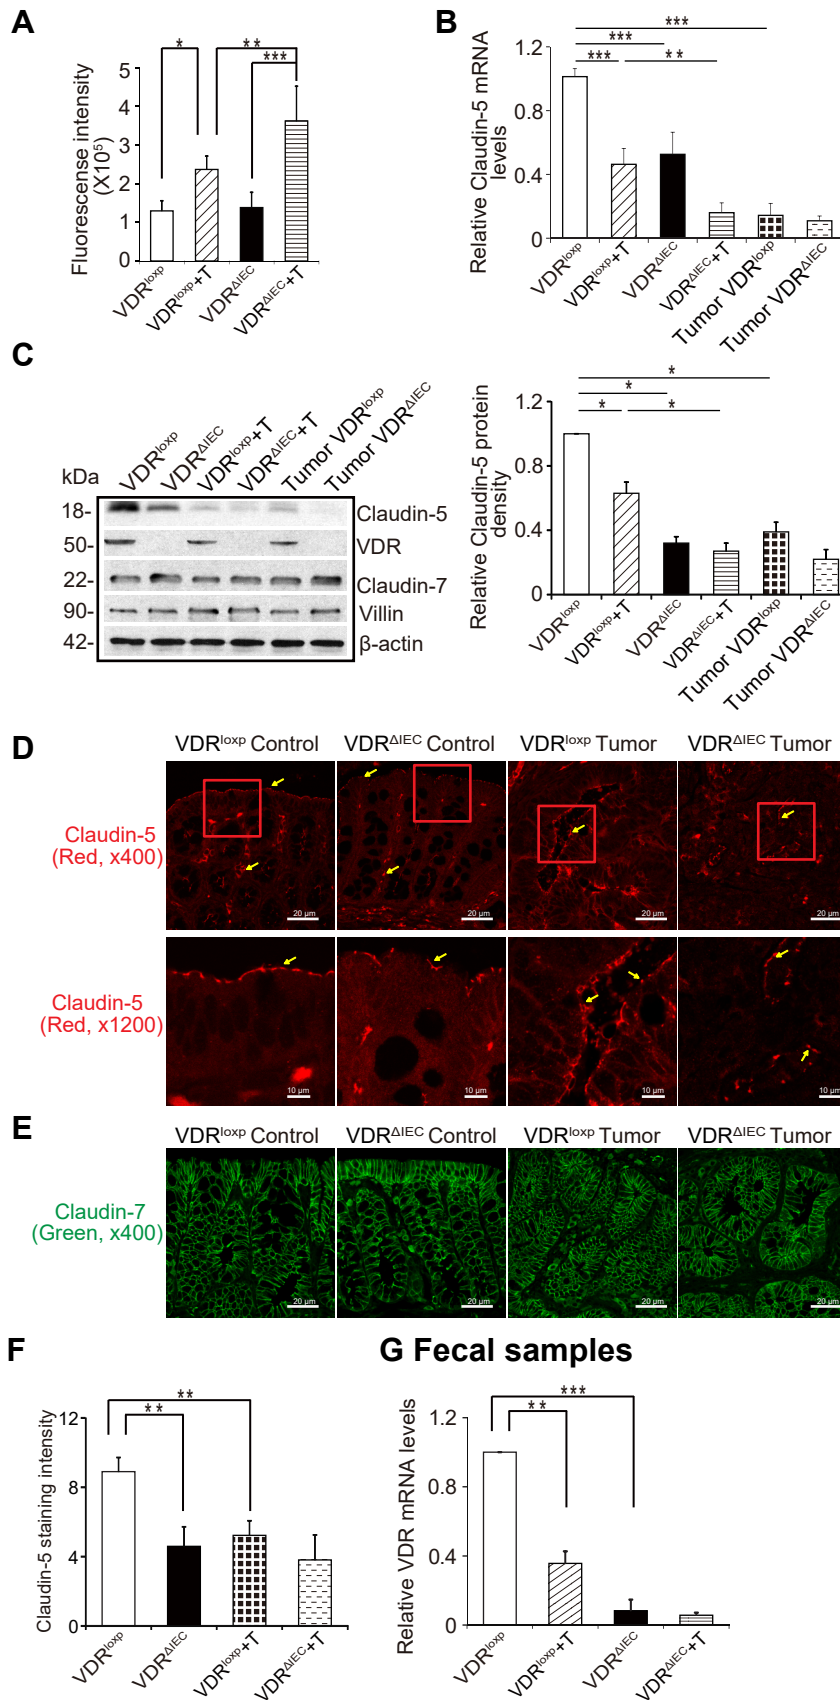

**Figure. 5**

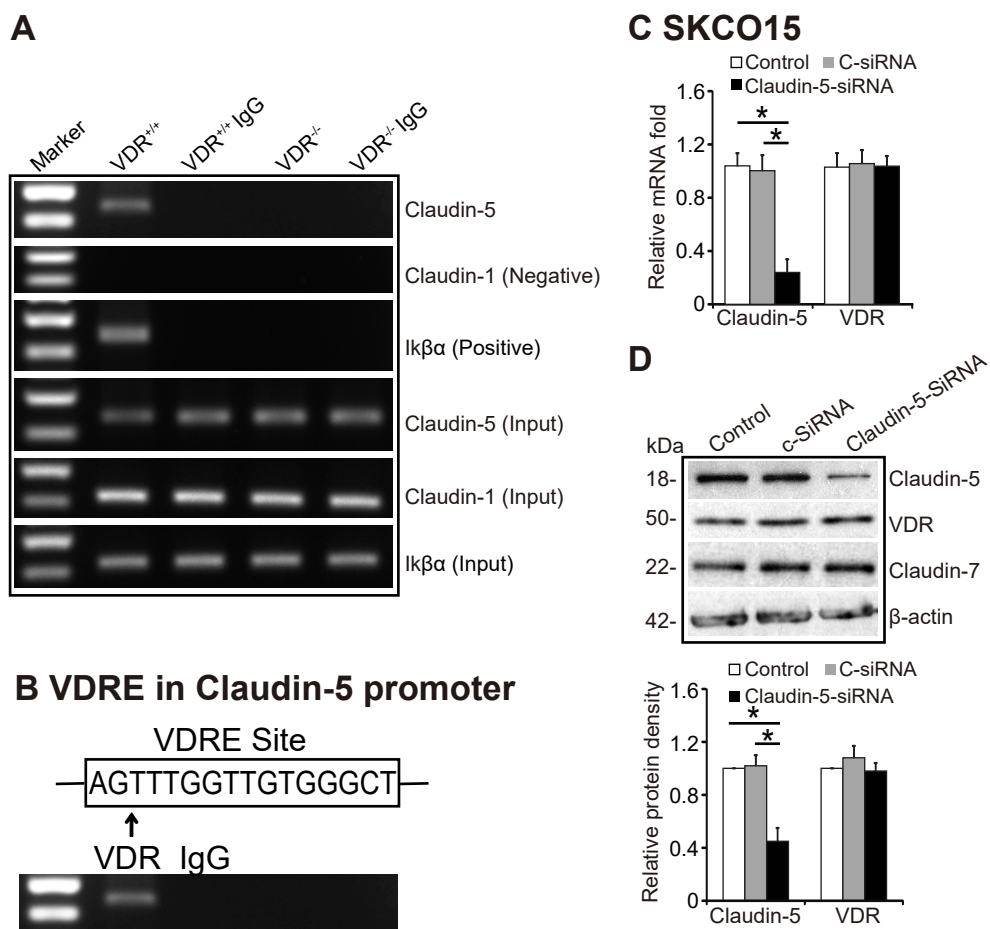

**Figure. 6**

**A SKCO15**

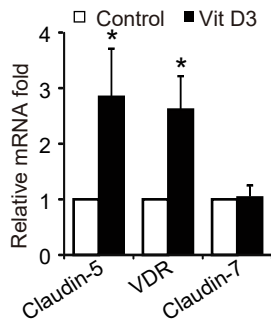

**B**

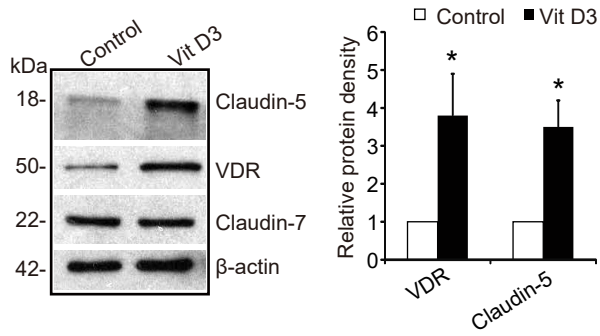

**C Mice colon**

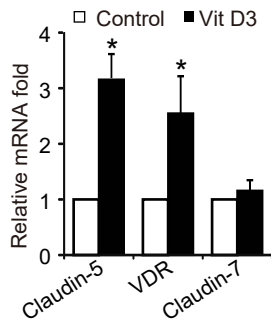

**D**

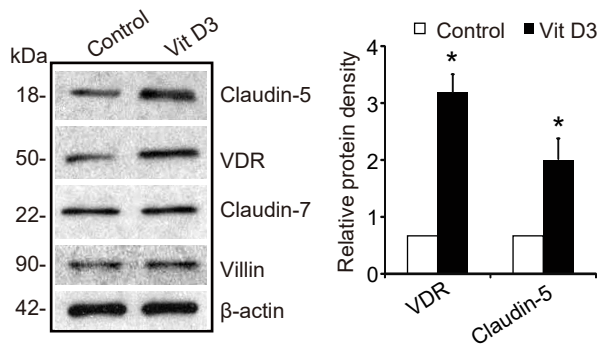

**E Human Colonoids**

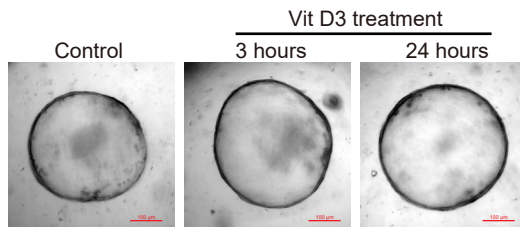

**F**

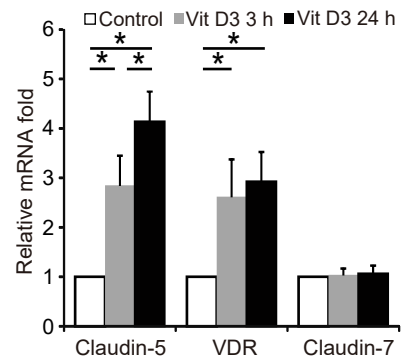

**G**

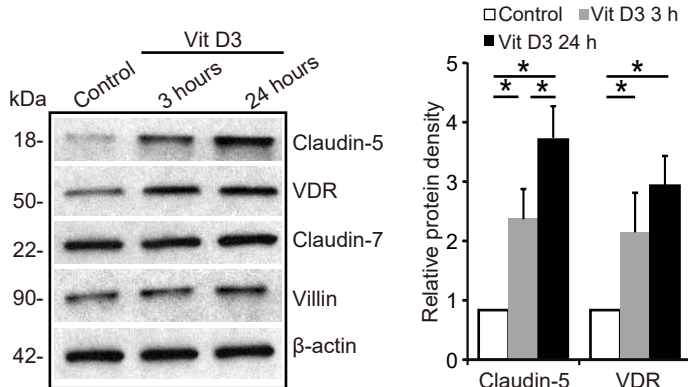

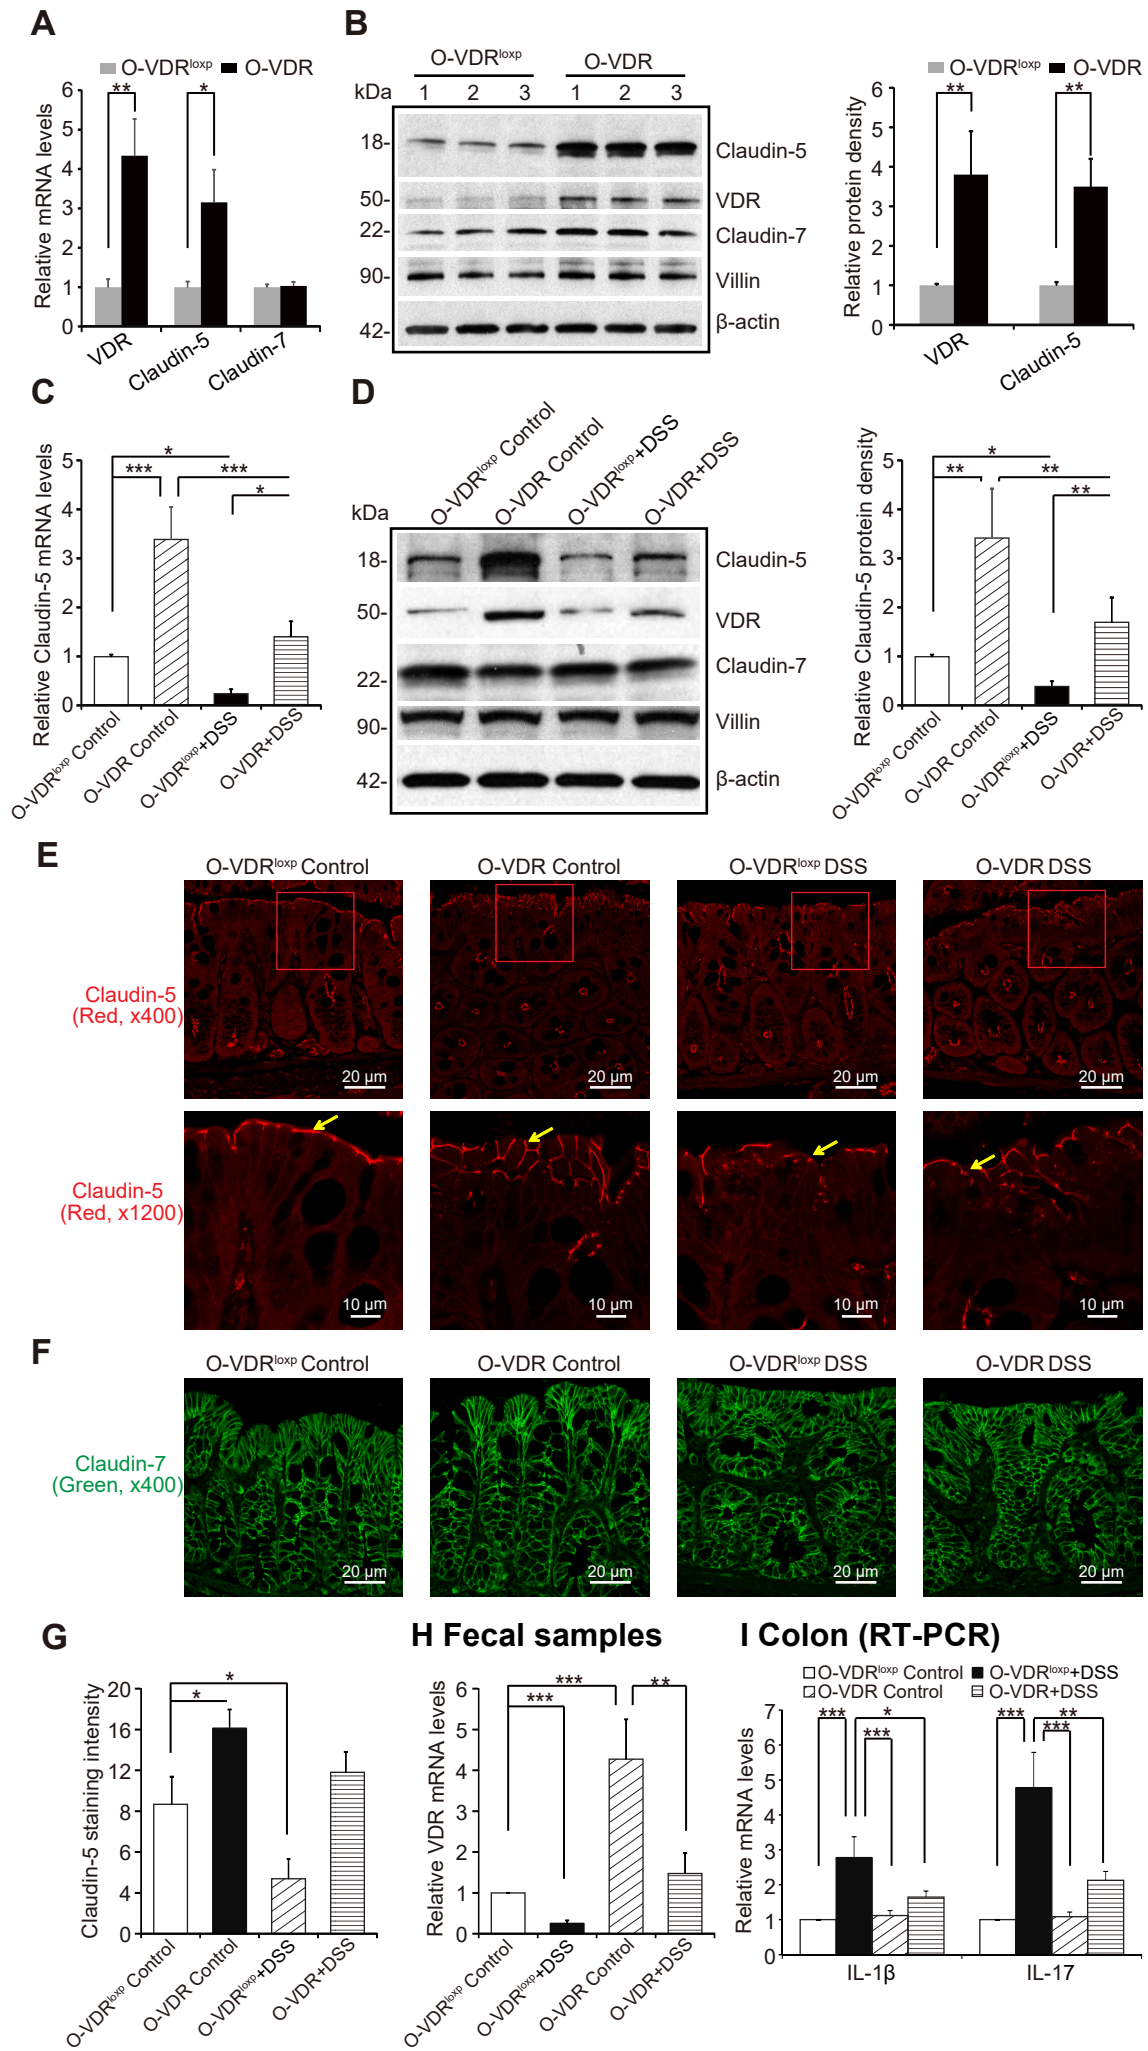

**Fig. S1. VDR deficiency in intestinal epithelial cells of mice leads to the reduction of Claudin-5 at both the mRNA and protein levels *in vivo*.**

**(A)** Claudin-5 protein and **(B)** mRNA levels were significantly lower in  $VDR^{-/-}$  mice compared to levels in the  $VDR^{+/+}$  mice (data are expressed as mean  $\pm$  SD.  $n = 5$ , student's t-test,  $*P < 0.05$ ). **(C)** Location of Claudin-5 protein in the colons of  $VDR^{+/+}$  and  $VDR^{-/-}$  mice. Images are from a single experiment and are representative of 5 mice per group. **(D)** Claudin-5 protein and **(E)** mRNA levels were significantly lower in  $VDR^{\Delta IEC}$  mice compared to levels in the  $VDR^{loxP}$  mice (data are expressed as mean  $\pm$  SD.  $n = 5$ , student's t-test,  $*P < 0.05$ ). **(F)** Claudin-5 protein and **(G)** mRNA were both decreased in  $VDR^{-/-}$  MEF cells (data are expressed as mean  $\pm$  SD.  $n = 3$ , student's t-test,  $*P < 0.05$ ). **(H)** Location and quantification of Claudin-5 protein in  $VDR^{+/+}$  and  $VDR^{-/-}$  MEF cells. Images are from a single experiment performed in triplicate. (Data are expressed as mean  $\pm$  SD.  $n = 3$ , one-way ANOVA test,  $*P < 0.05$ ).

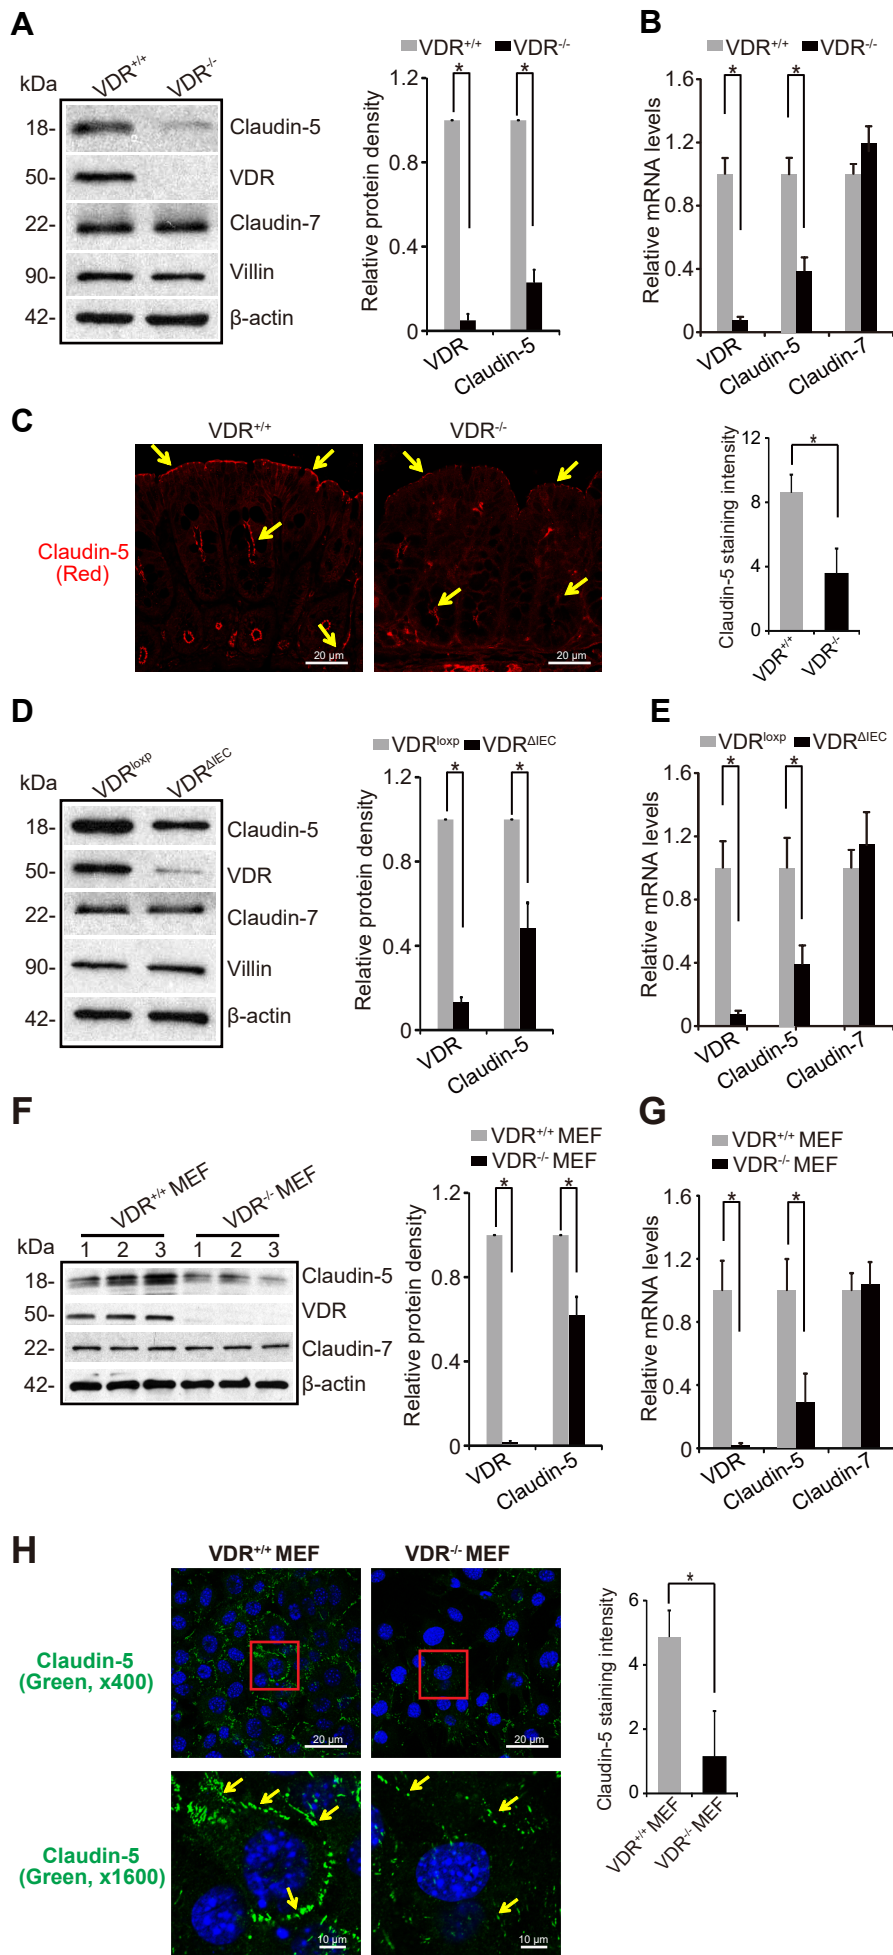

Source: https://biorxiv.org/content/10.1101/2021.04.29.441977v1.full.pdf
